# Supplementary material for: The cryptic gonadotropin-releasing hormone neuronal system of human basal ganglia
Source: eLife. 2021 Jun 15;10:e67714. doi: 10.7554/eLife.67714 (PMC8245125; doi:10.7554/eLife.67714)
Supplement: Supplementary file 3. — Numeric values in counts per million reads. [file elife-67714-supp3.xlsx]

## Sheet: Classical receptors
Classical receptors
Ensembl	Gene symbol	Gene description	ChIN #21	ChIN #22	SPN #21	SPN #22
ENSG00000205035	AC136759.1	glutamate receptor, metabotropic 5 (GRM5) pseudogene	11.0224	22.8602	109.279	0
ENSG00000120907	ADRA1A	ALPHA-1A ADRENERGIC RECEPTOR	2.59963	4.57204	15.1453	0
ENSG00000184160	ADRA2C	ALPHA-2C ADRENERGIC RECEPTOR	4.57535	1.98122	37.5138	5.6883
ENSG00000043591	ADRB1	BETA-1 ADRENERGIC RECEPTOR	0.519926	6.24845	34.0188	25.5973
ENSG00000168539	CHRM1	MUSCARINIC ACETYLCHOLINE RECEPTOR M1	0.831882	5.33404	150.987	82.4803
ENSG00000181072	CHRM2	MUSCARINIC ACETYLCHOLINE RECEPTOR M2	368.108	294.287	77.3577	0
ENSG00000133019	CHRM3	MUSCARINIC ACETYLCHOLINE RECEPTOR M3	7.59092	0	27.4946	17.0649
ENSG00000180720	CHRM4	MUSCARINIC ACETYLCHOLINE RECEPTOR M4	12.2703	3.81003	35.1838	34.1298
ENSG00000184984	CHRM5	MUSCARINIC ACETYLCHOLINE RECEPTOR M5	1.76775	4.11483	0	17.0649
ENSG00000129749	CHRNA10	NEURONAL ACETYLCHOLINE RECEPTOR SUBUNIT ALPHA-10	4.78332	7.31526	12.3493	28.4415
ENSG00000101204	CHRNA4	NEURONAL ACETYLCHOLINE RECEPTOR SUBUNIT ALPHA-4	10.3985	6.85806	24.6986	8.53245
ENSG00000160716	CHRNB2	NEURONAL ACETYLCHOLINE RECEPTOR SUBUNIT BETA-2	160.033	116.739	70.3676	39.8181
ENSG00000135902	CHRND	ACETYLCHOLINE RECEPTOR SUBUNIT DELTA	2.39166	1.21921	0	0
ENSG00000184845	DRD1	D(1A) DOPAMINE RECEPTOR	9.35867	4.57204	182.443	139.363
ENSG00000149295	DRD2	D(2) DOPAMINE RECEPTOR	327.033	215.343	144.463	156.428
ENSG00000151577	DRD3	D(3) DOPAMINE RECEPTOR	18.4054	50.7496	20.9705	54.0388
ENSG00000169676	DRD5	D(1B) DOPAMINE RECEPTOR	101.906	50.5972	0	8.53245
ENSG00000139112	GABARAPL1	GAMMA-AMINOBUTYRIC ACID RECEPTOR-ASSOCIATED PROTEIN-LIKE 1	296.462	151.487	55.9213	102.389
ENSG00000034713	GABARAPL2	GAMMA-AMINOBUTYRIC ACID RECEPTOR-ASSOCIATED PROTEIN-LIKE 2	135.077	89.1547	48.2321	22.7532
ENSG00000204681	GABBR1	GAMMA-AMINOBUTYRIC ACID TYPE B RECEPTOR SUBUNIT 1	652.091	513.592	391.682	443.687
ENSG00000136928	GABBR2	GAMMA-AMINOBUTYRIC ACID TYPE B RECEPTOR SUBUNIT 2	64.3668	85.4971	48.4651	42.6622
ENSG00000022355	GABRA1	GAMMA-AMINOBUTYRIC ACID RECEPTOR SUBUNIT ALPHA-1	55.0082	86.8687	51.0281	0
ENSG00000151834	GABRA2	GAMMA-AMINOBUTYRIC ACID RECEPTOR SUBUNIT ALPHA-2	123.43	114.453	128.619	42.6622
ENSG00000011677	GABRA3	GAMMA-AMINOBUTYRIC ACID RECEPTOR SUBUNIT ALPHA-3	87.4516	54.8644	0	0
ENSG00000109158	GABRA4	GAMMA-AMINOBUTYRIC ACID RECEPTOR SUBUNIT ALPHA-4	266.826	329.949	193.86	227.532
ENSG00000186297	GABRA5	GAMMA-AMINOBUTYRIC ACID RECEPTOR SUBUNIT ALPHA-5	6.96701	19.9646	124.891	102.389
ENSG00000163288	GABRB1	GAMMA-AMINOBUTYRIC ACID RECEPTOR SUBUNIT BETA-1	94.3146	90.9835	119.066	59.7271
ENSG00000145864	GABRB2	GAMMA-AMINOBUTYRIC ACID RECEPTOR SUBUNIT BETA-2	51.0567	64.3133	79.2218	162.117
ENSG00000166206	GABRB3	GAMMA-AMINOBUTYRIC ACID RECEPTOR SUBUNIT BETA-3	278.68	210.923	281.237	287.259
ENSG00000187730	GABRD	GAMMA-AMINOBUTYRIC ACID RECEPTOR SUBUNIT DELTA	2.70362	4.11483	162.172	68.2596
ENSG00000102287	GABRE	GAMMA-AMINOBUTYRIC ACID RECEPTOR SUBUNIT EPSILON	12.3742	14.6305	0	11.3766
ENSG00000163285	GABRG1	GAMMA-AMINOBUTYRIC ACID RECEPTOR SUBUNIT GAMMA-1	5.40723	19.355	0	14.2207
ENSG00000113327	GABRG2	GAMMA-AMINOBUTYRIC ACID RECEPTOR SUBUNIT GAMMA-2	152.338	114.149	100.425	71.1037
ENSG00000182256	GABRG3	GAMMA-AMINOBUTYRIC ACID RECEPTOR SUBUNIT GAMMA-3	127.798	83.8207	14.6793	0
ENSG00000268089	GABRQ	GAMMA-AMINOBUTYRIC ACID RECEPTOR SUBUNIT THETA	1.76775	12.4969	0	0
ENSG00000155511	GRIA1	GLUTAMATE RECEPTOR 1	14.5579	32.7663	290.558	383.96
ENSG00000120251	GRIA2	GLUTAMATE RECEPTOR 2	285.855	575.162	768.684	509.103
ENSG00000125675	GRIA3	GLUTAMATE RECEPTOR 3	212.754	186.082	397.74	335.61
ENSG00000152578	GRIA4	GLUTAMATE RECEPTOR 4	290.535	216.41	137.007	42.6622
ENSG00000182771	GRID1	GLUTAMATE RECEPTOR IONOTROPIC, DELTA-1	45.7535	70.257	114.173	105.234
ENSG00000152208	GRID2	GLUTAMATE RECEPTOR IONOTROPIC, DELTA-2	33.8992	23.927	54.5232	31.2856
ENSG00000171189	GRIK1	GLUTAMATE RECEPTOR IONOTROPIC, KAINATE 1	6.44708	15.0877	8.38819	39.8181
ENSG00000164418	GRIK2	GLUTAMATE RECEPTOR IONOTROPIC, KAINATE 2	56.048	41.1483	195.724	68.2596
ENSG00000163873	GRIK3	GLUTAMATE RECEPTOR IONOTROPIC, KAINATE 3	8.83874	4.41964	123.726	122.298
ENSG00000149403	GRIK4	GLUTAMATE RECEPTOR IONOTROPIC, KAINATE 4	105.961	58.9793	47.0671	79.6362
ENSG00000105737	GRIK5	GLUTAMATE RECEPTOR IONOTROPIC, KAINATE 5	70.7099	76.2006	61.7464	73.9479
ENSG00000176884	GRIN1	GLUTAMATE RECEPTOR IONOTROPIC, NMDA 1	526.269	430.381	880.061	853.245
ENSG00000183454	GRIN2A	GLUTAMATE RECEPTOR IONOTROPIC, NMDA 2A	22.1489	51.8164	296.616	292.947
ENSG00000273079	GRIN2B	GLUTAMATE RECEPTOR IONOTROPIC, NMDA 2B	1002.52	828.148	1035.94	984.076
ENSG00000161509	GRIN2C	GLUTAMATE RECEPTOR IONOTROPIC, NMDA 2C	4.15941	6.09605	11.8833	0
ENSG00000105464	GRIN2D	GLUTAMATE RECEPTOR IONOTROPIC, NMDA 2D	26.9322	24.8414	38.9119	17.0649
ENSG00000198785	GRIN3A	GLUTAMATE RECEPTOR IONOTROPIC, NMDA 3A	61.6632	46.1776	13.0483	39.8181
ENSG00000155974	GRIP1	GLUTAMATE RECEPTOR-INTERACTING PROTEIN 1	41.2821	30.1754	71.9986	65.4154
ENSG00000144596	GRIP2	GLUTAMATE RECEPTOR-INTERACTING PROTEIN 2	6.86302	23.3174	44.271	22.7532
ENSG00000152822	GRM1	METABOTROPIC GLUTAMATE RECEPTOR 1	3.22354	0.914407	56.8533	116.61
ENSG00000164082	GRM2	METABOTROPIC GLUTAMATE RECEPTOR 2	66.7585	60.1985	9.0872	5.6883
ENSG00000198822	GRM3	METABOTROPIC GLUTAMATE RECEPTOR 3	18.8213	3.20043	69.9016	39.8181
ENSG00000124493	GRM4	METABOTROPIC GLUTAMATE RECEPTOR 4	12.4782	18.4406	318.285	329.921
ENSG00000168959	GRM5	METABOTROPIC GLUTAMATE RECEPTOR 5	10.5025	3.65763	47.9991	56.883
ENSG00000113262	GRM6	METABOTROPIC GLUTAMATE RECEPTOR 6	3.95144	18.593	13.7473	39.8181
ENSG00000196277	GRM7	METABOTROPIC GLUTAMATE RECEPTOR 7	25.9963	45.2632	86.6779	62.5713
ENSG00000179603	GRM8	METABOTROPIC GLUTAMATE RECEPTOR 8	3.5355	10.6681	53.8242	28.4415
ENSG00000196639	HRH1	HISTAMINE H1 RECEPTOR	1.03985	6.09605	0	0
ENSG00000113749	HRH2	HISTAMINE H2 RECEPTOR	122.495	138.533	148.191	59.7271
ENSG00000101180	HRH3	HISTAMINE H3 RECEPTOR	15.3898	9.60128	167.531	105.234
ENSG00000179546	HTR1D	5-HYDROXYTRYPTAMINE RECEPTOR 1D	0	0	8.15518	5.6883
ENSG00000275811	HTR1DP1	5-hydroxytryptamine receptor 1D pseudogene 1 [Source:HGNC Symbol;Acc:HGNC:5290]	1.14384	12.0397	0	11.3766
ENSG00000168830	HTR1E	5-HYDROXYTRYPTAMINE RECEPTOR 1E	54.0723	22.7078	8.38819	0
ENSG00000179097	HTR1F	5-HYDROXYTRYPTAMINE RECEPTOR 1F	14.9739	17.0689	0	0
ENSG00000102468	HTR2A	5-HYDROXYTRYPTAMINE RECEPTOR 2A	39.4104	17.9833	0	5.6883
ENSG00000147246	HTR2C	5-HYDROXYTRYPTAMINE RECEPTOR 2C	6.86302	4.72444	224.85	122.298
ENSG00000166736	HTR3A	5-HYDROXYTRYPTAMINE RECEPTOR 3A	0.727896	0	5.82513	34.1298
ENSG00000164270	HTR4	5-HYDROXYTRYPTAMINE RECEPTOR 4	8.73476	12.0397	47.7661	0
ENSG00000157219	HTR5A	5-HYDROXYTRYPTAMINE RECEPTOR 5A	42.6339	39.1671	0	76.792
ENSG00000158748	HTR6	5-HYDROXYTRYPTAMINE RECEPTOR 6	0.623911	1.67641	105.085	54.0388
ENSG00000148680	HTR7	5-HYDROXYTRYPTAMINE RECEPTOR 7	37.8506	28.1942	0	0
ENSG00000183935	HTR7P1	5-hydroxytryptamine receptor 7 pseudogene 1 [Source:HGNC Symbol;Acc:HGNC:30411]	1.66376	1.67641	5.82513	0

## Sheet: Other receptors
Other receptors
Ensembl	Gene symbol	Gene description	ChIN #21	ChIN #22	SPN #21	SPN #22
ENSG00000261056	AC079416.1	thyroid hormone receptor interactor 13 (TRIP13) pseudogene	10.7105	4.26723	18.1744	0
ENSG00000263326	AC133552.4	thyroid hormone receptor interactor 11 (TRIP11) pseudogene	2.70362	7.46766	14.6793	54.0388
ENSG00000256981	AC134349.2	taste receptor, type 2, member 18 pseudogene	2.59963	11.4301	0	0
ENSG00000213088	ACKR1	ATYPICAL CHEMOKINE RECEPTOR 1	1.76775	3.65763	35.1838	0
ENSG00000129048	ACKR4	ATYPICAL CHEMOKINE RECEPTOR 4	1.97572	6.40085	0	0
ENSG00000115170	ACVR1	ACTIVIN RECEPTOR TYPE-1	10.8145	16.6117	8.62119	0
ENSG00000135503	ACVR1B	ACTIVIN RECEPTOR TYPE-1B	202.979	205.894	93.9011	59.7271
ENSG00000123612	ACVR1C	ACTIVIN RECEPTOR TYPE-1C	17.9894	7.92486	89.707	153.584
ENSG00000121989	ACVR2A	ACTIVIN RECEPTOR TYPE-2A	34.7311	44.806	21.6695	2.84415
ENSG00000114739	ACVR2B	ACTIVIN RECEPTOR TYPE-2B	47.6252	88.2403	52.6592	36.9739
ENSG00000139567	ACVRL1	SERINE/THREONINE-PROTEIN KINASE RECEPTOR R3	2.49565	2.74322	0.233005	0
ENSG00000078549	ADCYAP1R1	PITUITARY ADENYLATE CYCLASE-ACTIVATING POLYPEPTIDE TYPE I RECEPTOR	146.931	139.447	54.5232	105.234
ENSG00000197177	ADGRA1	ADHESION G PROTEIN-COUPLED RECEPTOR A1	15.0779	8.38207	12.5823	2.84415
ENSG00000152990	ADGRA3	ADHESION G PROTEIN-COUPLED RECEPTOR A3	27.868	4.11483	15.8444	11.3766
ENSG00000181790	ADGRB1	ADHESION G PROTEIN-COUPLED RECEPTOR B1	46.8973	52.5784	316.887	238.909
ENSG00000121753	ADGRB2	ADHESION G PROTEIN-COUPLED RECEPTOR B2	37.7466	45.2632	430.827	372.584
ENSG00000135298	ADGRB3	ADHESION G PROTEIN-COUPLED RECEPTOR B3	252.06	318.976	272.616	210.467
ENSG00000127507	ADGRE2	ADHESION G PROTEIN-COUPLED RECEPTOR E2	1.45579	6.24845	4.6601	5.6883
ENSG00000205336	ADGRG1	ADHESION G-PROTEIN COUPLED RECEPTOR G1	24.0206	28.9562	21.9025	34.1298
ENSG00000072071	ADGRL1	ADHESION G PROTEIN-COUPLED RECEPTOR L1	519.822	343.512	434.322	213.311
ENSG00000117114	ADGRL2	ADHESION G PROTEIN-COUPLED RECEPTOR L2	12.2703	18.7454	138.405	136.519
ENSG00000150471	ADGRL3	ADHESION G PROTEIN-COUPLED RECEPTOR L3	303.013	214.581	267.49	258.818
ENSG00000164199	ADGRV1	ADHESION G-PROTEIN COUPLED RECEPTOR V1	67.2784	112.472	160.541	318.545
ENSG00000159346	ADIPOR1	ADIPONECTIN RECEPTOR PROTEIN 1	54.8002	75.591	36.8148	51.1947
ENSG00000006831	ADIPOR2	ADIPONECTIN RECEPTOR PROTEIN 2	39.2024	31.5471	39.3779	79.6362
ENSG00000163485	ADORA1	ADENOSINE RECEPTOR A1	10.9184	1.52401	58.2513	36.9739
ENSG00000128271	ADORA2A	ADENOSINE RECEPTOR A2A	2.49565	2.13362	10.2522	0
ENSG00000170425	ADORA2B	ADENOSINE RECEPTOR A2B	1.45579	7.31526	0	8.53245
ENSG00000130706	ADRM1	PROTEASOMAL UBIQUITIN RECEPTOR ADRM1	32.0274	12.9541	29.1257	0
ENSG00000106546	AHR	ARYL HYDROCARBON RECEPTOR	0	9.29648	13.0483	31.2856
ENSG00000110711	AIP	AH RECEPTOR-INTERACTING PROTEIN	23.6046	5.63885	19.8054	0
ENSG00000262668	AJ003147.2	olfactory receptor family 1 subfamily F member 1 (gene/pseudogene) [Source:NCBI gene (formerly Entrezgene);Acc:4992]	4.57535	2.13362	17.2424	0
ENSG00000171094	ALK	ALK TYROSINE KINASE RECEPTOR	82.5643	83.9731	59.1833	0
ENSG00000262943	ALOX12P2	GLUCAGON-LIKE PEPTIDE 2 RECEPTOR	28.076	33.2235	33.3197	14.2207
ENSG00000159461	AMFR	autocrine motility factor receptor [Source:HGNC Symbol;Acc:HGNC:463]	132.165	124.664	113.94	139.363
ENSG00000169604	ANTXR1	ANTHRAX TOXIN RECEPTOR 1	7.27896	15.8497	19.3394	11.3766
ENSG00000254937	AP000916.1	olfactory receptor, family 8, subfamily B, member 3 pseudogene	1.66376	9.29648	0	0
ENSG00000169083	AR	ANDROGEN RECEPTOR	1.03985	15.3925	0	0
ENSG00000143437	ARNT	ARYL HYDROCARBON RECEPTOR NUCLEAR TRANSLOCATOR	58.2317	63.7037	80.6198	5.6883
ENSG00000172379	ARNT2	ARYL HYDROCARBON RECEPTOR NUCLEAR TRANSLOCATOR 2	81.7324	81.2299	448.535	307.168
ENSG00000133794	ARNTL	ARYL HYDROCARBON RECEPTOR NUCLEAR TRANSLOCATOR-LIKE PROTEIN 1	16.7416	7.77246	39.3779	31.2856
ENSG00000029153	ARNTL2	ARYL HYDROCARBON RECEPTOR NUCLEAR TRANSLOCATOR-LIKE PROTEIN 2	20.3811	20.2694	34.9508	31.2856
ENSG00000182220	ATP6AP2	RENIN RECEPTOR	154.418	129.998	14.6793	145.052
ENSG00000107779	BMPR1A	BONE MORPHOGENETIC PROTEIN RECEPTOR TYPE-1A	33.7952	20.117	45.436	17.0649
ENSG00000138696	BMPR1B	BONE MORPHOGENETIC PROTEIN RECEPTOR TYPE-1B	91.8189	120.397	19.3394	0
ENSG00000204217	BMPR2	BONE MORPHOGENETIC PROTEIN RECEPTOR TYPE-2	491.33	444.25	255.84	310.012
ENSG00000179270	C2orf71	PHOTORECEPTOR CILIUM ACTIN REGULATOR	4.57535	15.3925	0	0
ENSG00000198663	C6orf89	BOMBESIN RECEPTOR-ACTIVATED PROTEIN C6ORF89	203.083	132.132	129.551	91.0128
ENSG00000163394	CCKAR	CHOLECYSTOKININ RECEPTOR TYPE A	12.4782	3.96243	0	0
ENSG00000177575	CD163	SCAVENGER RECEPTOR CYSTEINE-RICH TYPE 1 PROTEIN M130	1.14384	11.1253	0.233005	85.3245
ENSG00000177675	CD163L1	SCAVENGER RECEPTOR CYSTEINE-RICH TYPE 1 PROTEIN M160	0	0.304802	25.3976	31.2856
ENSG00000012124	CD22	B-CELL RECEPTOR CD22	11.3344	9.14407	9.32021	8.53245
ENSG00000075275	CELSR1	CADHERIN EGF LAG SEVEN-PASS G-TYPE RECEPTOR 1	5.51122	16.7641	0	59.7271
ENSG00000143126	CELSR2	CADHERIN EGF LAG SEVEN-PASS G-TYPE RECEPTOR 2	443.705	338.026	357.43	455.064
ENSG00000008300	CELSR3	CADHERIN EGF LAG SEVEN-PASS G-TYPE RECEPTOR 3	169.808	245.518	202.948	113.766
ENSG00000174600	CMKLR1	CHEMOKINE-LIKE RECEPTOR 1	1.45579	6.09605	0	11.3766
ENSG00000118432	CNR1	CANNABINOID RECEPTOR 1	6.3431	30.1754	239.995	437.999
ENSG00000119865	CNRIP1	CB1 CANNABINOID RECEPTOR-INTERACTING PROTEIN 1	45.3376	27.2798	68.2705	48.3505
ENSG00000122756	CNTFR	CILIARY NEUROTROPHIC FACTOR RECEPTOR SUBUNIT ALPHA	23.7086	23.0126	20.2715	2.84415
ENSG00000120088	CRHR1	CORTICOTROPIN-RELEASING FACTOR RECEPTOR 1	2.8076	2.28602	17.4754	0
ENSG00000106113	CRHR2	CORTICOTROPIN-RELEASING FACTOR RECEPTOR 2	1.14384	6.70565	0	5.6883
ENSG00000006016	CRLF1	CYTOKINE RECEPTOR-LIKE FACTOR 1	2.59963	0.304802	8.62119	8.53245
ENSG00000176390	CRLF3	CYTOKINE RECEPTOR-LIKE FACTOR 3	34.1071	59.1317	109.745	62.5713
ENSG00000100058	CRYBB2P1	RECEPTOR-TRANSPORTING PROTEIN 4	15.1818	15.0877	19.1064	110.922
ENSG00000154639	CXADR	COXSACKIEVIRUS AND ADENOVIRUS RECEPTOR	30.4677	23.7746	12.3493	28.4415
ENSG00000152207	CYSLTR2	CYSTEINYL LEUKOTRIENE RECEPTOR 2	1.55978	0	21.4365	2.84415
ENSG00000182578	CSF1R	MACROPHAGE COLONY-STIMULATING FACTOR 1 RECEPTOR	7.79889	2.13362	0.233005	31.2856
ENSG00000187323	DCC	NETRIN RECEPTOR DCC	9.1507	22.7078	138.638	216.155
ENSG00000204580	DDR1	EPITHELIAL DISCOIDIN DOMAIN-CONTAINING RECEPTOR 1	47.2093	39.1671	60.8144	54.0388
ENSG00000187957	DNER	DELTA AND NOTCH-LIKE EPIDERMAL GROWTH FACTOR-RELATED RECEPTOR	966.439	726.192	100.425	68.2596
ENSG00000147654	EBAG9	RECEPTOR-BINDING CANCER ANTIGEN EXPRESSED ON SISO CELLS	9.98258	25.7558	9.32021	2.84415
ENSG00000136160	EDNRB	ENDOTHELIN RECEPTOR TYPE B	7.17498	27.737	15.8444	39.8181
ENSG00000232587	EEF1A1P3	OLFACTORY RECEPTOR 9G1-RELATED	1.24782	3.20043	9.78622	0
ENSG00000146648	EGFR	EPIDERMAL GROWTH FACTOR RECEPTOR	6.44708	0	154.715	99.5452
ENSG00000183317	EPHA10	EPHRIN TYPE-A RECEPTOR 10	84.228	64.3133	80.8528	133.675
ENSG00000116106	EPHA4	EPHRIN TYPE-A RECEPTOR 4	221.489	208.485	82.7169	176.337
ENSG00000145242	EPHA5	EPHRIN TYPE-A RECEPTOR 5	44.2977	23.4698	0	17.0649
ENSG00000080224	EPHA6	EPHRIN TYPE-A RECEPTOR 6	314.139	361.953	137.007	105.234
ENSG00000135333	EPHA7	EPHRIN TYPE-A RECEPTOR 7	38.7865	36.7287	134.91	25.5973
ENSG00000154928	EPHB1	EPHRIN TYPE-B RECEPTOR 1	3.95144	2.89562	46.135	71.1037
ENSG00000133216	EPHB2	EPHRIN TYPE-B RECEPTOR 2	13.934	23.4698	30.7567	11.3766
ENSG00000106123	EPHB6	EPHRIN TYPE-B RECEPTOR 6	22.9807	37.1859	440.147	583.051
ENSG00000187266	EPOR	ERYTHROPOIETIN RECEPTOR	1.97572	0	4.4271	28.4415
ENSG00000065361	ERBB3	RECEPTOR TYROSINE-PROTEIN KINASE ERBB-3	49.9129	16.9165	16.7764	14.2207
ENSG00000178568	ERBB4	RECEPTOR TYROSINE-PROTEIN KINASE ERBB-4	46.5854	42.2151	191.064	102.389
ENSG00000281708	ERC2-IT1	T CELL RECEPTOR GAMMA VARIABLE 8	29.6358	22.403	0	0
ENSG00000116285	ERRFI1	ERBB RECEPTOR FEEDBACK INHIBITOR 1	26.7242	18.8978	34.2518	2.84415
ENSG00000091831	ESR1	ESTROGEN RECEPTOR	8.83874	6.70565	36.3488	2.84415
ENSG00000173153	ESRRA	STEROID HORMONE RECEPTOR ERR1	8.94273	16.9165	11.1843	2.84415
ENSG00000196482	ESRRG	ESTROGEN-RELATED RECEPTOR GAMMA	21.6289	1.82881	38.6789	19.909
ENSG00000164220	F2RL2	PROTEINASE-ACTIVATED RECEPTOR 3	5.71919	4.26723	0	0
ENSG00000112584	FAM120B	CONSTITUTIVE COACTIVATOR OF PEROXISOME PROLIFERATOR-ACTIVATED RECEPTOR GAMMA	98.9939	127.712	115.571	156.428
ENSG00000104870	FCGRT	IGG RECEPTOR FCRN LARGE SUBUNIT P51	1.76775	1.52401	13.2813	51.1947
ENSG00000077782	FGFR1	FIBROBLAST GROWTH FACTOR RECEPTOR 1	646.372	558.398	52.4262	14.2207
ENSG00000066468	FGFR2	FIBROBLAST GROWTH FACTOR RECEPTOR 2	38.0586	26.975	89.707	34.1298
ENSG00000068078	FGFR3	FIBROBLAST GROWTH FACTOR RECEPTOR 3	21.109	20.7266	65.2415	19.909
ENSG00000127418	FGFRL1	FIBROBLAST GROWTH FACTOR RECEPTOR-LIKE 1	6.65505	5.48644	31.9217	54.0388
ENSG00000122025	FLT3	RECEPTOR-TYPE TYROSINE-PROTEIN KINASE FLT3	4.05542	15.3925	6.05814	0
ENSG00000171049	FPR2	N-FORMYL PEPTIDE RECEPTOR 2	0	0	11.4173	2.84415
ENSG00000166573	GALR1	GALANIN RECEPTOR TYPE 1	105.129	121.311	0	17.0649
ENSG00000151892	GFRA1	GDNF FAMILY RECEPTOR ALPHA-1	5.71919	1.52401	51.7272	42.6622
ENSG00000168546	GFRA2	GDNF FAMILY RECEPTOR ALPHA-2	16.1177	25.1462	0	0
ENSG00000146013	GFRA3	GDNF FAMILY RECEPTOR ALPHA-3	29.0119	9.75368	0	0
ENSG00000112164	GLP1R	GLUCAGON-LIKE PEPTIDE 1 RECEPTOR	5.09528	0	48.2321	71.1037
ENSG00000145888	GLRA1	GLYCINE RECEPTOR SUBUNIT ALPHA-1	45.7535	20.5742	14.2133	0
ENSG00000101958	GLRA2	GLYCINE RECEPTOR SUBUNIT ALPHA-2	66.4466	38.1003	0	34.1298
ENSG00000145451	GLRA3	GLYCINE RECEPTOR SUBUNIT ALPHA-3	23.0847	16.7641	50.7951	0
ENSG00000109738	GLRB	GLYCINE RECEPTOR SUBUNIT BETA	97.2262	81.0775	14.9123	79.6362
ENSG00000109163	GNRHR	GONADOTROPIN-RELEASING HORMONE RECEPTOR	7.79889	5.02924	0	0
ENSG00000211451	GNRHR2	GONADOTROPIN-RELEASING HORMONE II RECEPTOR-RELATED	1.24782	1.98122	0	0
ENSG00000108587	GOSR1	GOLGI SNAP RECEPTOR COMPLEX MEMBER 1	41.2821	70.1046	40.3099	48.3505
ENSG00000108433	GOSR2	GOLGI SNAP RECEPTOR COMPLEX MEMBER 2	58.3357	92.8124	80.3868	130.831
ENSG00000164850	GPER1	G-PROTEIN COUPLED ESTROGEN RECEPTOR 1	11.6463	8.07727	7.22316	0
ENSG00000165370	GPR101	G-PROTEIN COUPLED RECEPTOR 101-RELATED	2.39166	10.3633	54.2902	62.5713
ENSG00000132975	GPR12	G-PROTEIN COUPLED RECEPTOR 12	35.147	27.8894	56.8533	119.454
ENSG00000181619	GPR135	G-PROTEIN COUPLED RECEPTOR 135	18.0934	13.1065	31.4557	5.6883
ENSG00000101850	GPR143	G-PROTEIN COUPLED RECEPTOR 143	8.94273	5.63885	37.2808	0
ENSG00000164849	GPR146	G-PROTEIN COUPLED RECEPTOR 146-RELATED	6.23911	1.82881	0	0
ENSG00000174948	GPR149	G-PROTEIN COUPLED RECEPTOR 149-RELATED	4.57535	17.9833	73.6297	56.883
ENSG00000154165	GPR15	G-PROTEIN COUPLED RECEPTOR 15	0	0	18.6404	2.84415
ENSG00000178015	GPR150	G-PROTEIN COUPLED RECEPTOR 150-RELATED	1.24782	5.33404	0	0
ENSG00000158292	GPR153	G-PROTEIN COUPLED RECEPTOR 153-RELATED	25.7883	34.7475	0.233005	39.8181
ENSG00000175697	GPR156	G-PROTEIN COUPLED RECEPTOR 156-RELATED	54.1763	17.2213	0	22.7532
ENSG00000180758	GPR157	G-PROTEIN COUPLED RECEPTOR 157	2.28767	0.152401	15.3783	8.53245
ENSG00000151025	GPR158	G-PROTEIN COUPLED RECEPTOR 158-RELATED	1091.32	803.155	270.985	145.052
ENSG00000250510	GPR162	G-PROTEIN COUPLED RECEPTOR 162-RELATED	65.5107	105.309	69.9016	65.4154
ENSG00000144230	GPR17	URACIL NUCLEOTIDE/CYSTEINYL LEUKOTRIENE RECEPTOR	1.45579	7.16286	18.8734	54.0388
ENSG00000174946	GPR171	G-PROTEIN COUPLED RECEPTOR 171-RELATED	1.76775	11.5825	0	28.4415
ENSG00000184194	GPR173	G-PROTEIN COUPLED RECEPTOR 173-RELATED	32.8593	17.8309	17.0094	34.1298
ENSG00000166073	GPR176	G-PROTEIN COUPLED RECEPTOR 176	37.2267	32.0043	20.7375	0
ENSG00000277399	GPR179	G protein-coupled receptor 179 [Source:HGNC Symbol;Acc:HGNC:31371]	6.96701	19.5074	9.0872	34.1298
ENSG00000166856	GPR182	G-PROTEIN COUPLED RECEPTOR 182	2.28767	2.59082	17.9414	0
ENSG00000183150	GPR19	G-PROTEIN COUPLED RECEPTOR 19-RELATED	14.246	6.24845	21.4365	0
ENSG00000172209	GPR22	G-PROTEIN COUPLED RECEPTOR 22	11.4384	8.53447	0	48.3505
ENSG00000154478	GPR26	G-PROTEIN COUPLED RECEPTOR 26	5.71919	16.6117	0	0
ENSG00000170837	GPR27	G-PROTEIN COUPLED RECEPTOR 27-RELATED	10.9184	4.11483	11.1843	0
ENSG00000171659	GPR34	G-PROTEIN COUPLED RECEPTOR 34-RELATED	1.14384	1.82881	0	2.84415
ENSG00000178623	GPR35	G-PROTEIN COUPLED RECEPTOR 35	0	1.98122	12.5823	22.7532
ENSG00000170775	GPR37	PROSAPOSIN RECEPTOR GPR37	35.147	32.0043	34.9508	0
ENSG00000170075	GPR37L1	G-PROTEIN COUPLED RECEPTOR 37-LIKE 1	20.0691	13.8685	69.4356	14.2207
ENSG00000135973	GPR45	G-PROTEIN COUPLED RECEPTOR 45-RELATED	15.5978	4.11483	0	0
ENSG00000146360	GPR6	G-PROTEIN COUPLED RECEPTOR 6	1.03985	2.74322	179.647	42.6622
ENSG00000156097	GPR61	G-PROTEIN COUPLED RECEPTOR 61	49.185	98.4512	84.5809	36.9739
ENSG00000112218	GPR63	G-PROTEIN COUPLED RECEPTOR 63-RELATED	49.7049	65.6849	38.2129	0
ENSG00000119714	GPR68	OVARIAN CANCER G-PROTEIN COUPLED RECEPTOR 1	11.1264	12.9541	29.3587	8.53245
ENSG00000119737	GPR75	G-PROTEIN COUPLED RECEPTOR 75-RELATED	15.1818	10.3633	14.9123	28.4415
ENSG00000232374	GPR79	G protein-coupled receptor 79, pseudogene [Source:HGNC Symbol;Acc:HGNC:4529]	2.0797	0	36.1158	68.2596
ENSG00000171657	GPR82	G-PROTEIN COUPLED RECEPTOR 82-RELATED	2.39166	7.16286	0	0
ENSG00000123901	GPR83	G-PROTEIN COUPLED RECEPTOR 83-RELATED	234.071	190.654	46.368	11.3766
ENSG00000164604	GPR85	G-PROTEIN COUPLED RECEPTOR 85-RELATED	34.835	30.1754	28.1936	62.5713
ENSG00000181656	GPR88	G-PROTEIN COUPLED RECEPTOR 88-RELATED	8.63077	25.6034	381.197	162.117
ENSG00000167191	GPRC5B	G-PROTEIN COUPLED RECEPTOR FAMILY C GROUP 5 MEMBER B	199.86	106.224	155.881	54.0388
ENSG00000106070	GRB10	GROWTH FACTOR RECEPTOR-BOUND PROTEIN 10	175.423	178.005	223.685	145.052
ENSG00000115290	GRB14	GROWTH FACTOR RECEPTOR-BOUND PROTEIN 14	8.73476	12.1921	0	0
ENSG00000177885	GRB2	GROWTH FACTOR RECEPTOR-BOUND PROTEIN 2	122.599	105.919	57.3193	76.792
ENSG00000125388	GRK4	G PROTEIN-COUPLED RECEPTOR KINASE 4	31.8195	31.8519	15.1453	108.078
ENSG00000198873	GRK5	G PROTEIN-COUPLED RECEPTOR KINASE 5	327.553	354.485	16.0774	19.909
ENSG00000198055	GRK6	G PROTEIN-COUPLED RECEPTOR KINASE 6	25.7883	11.7349	7.92218	19.909
ENSG00000268442	HAVCR1P1	hepatitis A virus cellular receptor 1 (HAVCR1) pseudogene	3.74347	8.07727	0	0
ENSG00000137252	HCRTR2	OREXIN RECEPTOR TYPE 2	10.2945	3.20043	0	17.0649
ENSG00000142166	IFNAR1	INTERFERON ALPHA/BETA RECEPTOR 1	191.125	156.973	64.7755	147.896
ENSG00000027697	IFNGR1	INTERFERON GAMMA RECEPTOR 1	50.5368	74.2194	51.7272	62.5713
ENSG00000159128	IFNGR2	INTERFERON GAMMA RECEPTOR 2	15.4938	0	47.5331	34.1298
ENSG00000140443	IGF1R	INSULIN-LIKE GROWTH FACTOR 1 RECEPTOR	133.517	106.833	91.5711	99.5452
ENSG00000197081	IGF2R	CATION-INDEPENDENT MANNOSE-6-PHOSPHATE RECEPTOR	155.77	169.013	140.968	307.168
ENSG00000243646	IL10RB	INTERLEUKIN-10 RECEPTOR SUBUNIT BETA	1.14384	8.22967	16.0774	8.53245
ENSG00000137070	IL11RA	INTERLEUKIN-11 RECEPTOR SUBUNIT ALPHA	12.7902	12.9541	54.9892	156.428
ENSG00000131724	IL13RA1	INTERLEUKIN-13 RECEPTOR SUBUNIT ALPHA-1	20.1731	23.0126	0	2.84415
ENSG00000177663	IL17RA	INTERLEUKIN-17 RECEPTOR A	15.7018	14.3257	142.366	130.831
ENSG00000056736	IL17RB	INTERLEUKIN-17 RECEPTOR B	14.9739	9.14407	0.46601	34.1298
ENSG00000163702	IL17RC	INTERLEUKIN-17 RECEPTOR C	1.03985	3.20043	0.699016	2.84415
ENSG00000163701	IL17RE	INTERLEUKIN-17 RECEPTOR E	0	3.96243	8.62119	45.5064
ENSG00000188263	IL17REL	INTERLEUKIN-17 RECEPTOR E-LIKE-RELATED	4.15941	4.11483	0	0
ENSG00000115594	IL1R1	INTERLEUKIN-1 RECEPTOR TYPE 1	4.05542	3.35283	0.699016	19.909
ENSG00000196083	IL1RAP	INTERLEUKIN-1 RECEPTOR ACCESSORY PROTEIN	10.7105	4.87684	0	25.5973
ENSG00000169306	IL1RAPL1	INTERLEUKIN-1 RECEPTOR ACCESSORY PROTEIN-LIKE 1	11.0224	0	101.59	34.1298
ENSG00000189108	IL1RAPL2	X-LINKED INTERLEUKIN-1 RECEPTOR ACCESSORY PROTEIN-LIKE 2	0.935867	0	15.1453	62.5713
ENSG00000103522	IL21R	INTERLEUKIN-21 RECEPTOR	3.84745	2.59082	0	0
ENSG00000160712	IL6R	INTERLEUKIN-6 RECEPTOR SUBUNIT ALPHA	3.5355	8.99167	0	31.2856
ENSG00000134352	IL6ST	INTERLEUKIN-6 RECEPTOR SUBUNIT BETA	241.454	239.727	140.735	28.4415
ENSG00000143195	ILDR2	IMMUNOGLOBULIN-LIKE DOMAIN-CONTAINING RECEPTOR 2	70.398	151.182	13.2813	34.1298
ENSG00000081148	IMPG2	INTERPHOTORECEPTOR MATRIX PROTEOGLYCAN 2	4.57535	21.4886	0	102.389
ENSG00000171105	INSR	INSULIN RECEPTOR	98.162	115.977	95.2991	82.4803
ENSG00000027644	INSRR	INSULIN RECEPTOR-RELATED PROTEIN	200.587	303.736	0	0
ENSG00000150995	ITPR1	INOSITOL 1,4,5-TRISPHOSPHATE RECEPTOR TYPE 1	47.8332	80.3155	828.567	824.803
ENSG00000123104	ITPR2	INOSITOL 1,4,5-TRISPHOSPHATE RECEPTOR TYPE 2	22.0449	17.5261	24.6986	68.2596
ENSG00000096433	ITPR3	INOSITOL 1,4,5-TRISPHOSPHATE RECEPTOR TYPE 3	2.91159	7.46766	23.3005	11.3766
ENSG00000148841	ITPRIP	INOSITOL 1,4,5-TRISPHOSPHATE RECEPTOR-INTERACTING PROTEIN	1.87173	15.0877	20.9705	11.3766
ENSG00000105438	KDELR1	ER LUMEN PROTEIN-RETAINING RECEPTOR 1	30.2597	18.8978	59.1833	14.2207
ENSG00000136240	KDELR2	ER LUMEN PROTEIN-RETAINING RECEPTOR 2	45.0256	30.7851	30.9897	96.7011
ENSG00000100196	KDELR3	ER LUMEN PROTEIN-RETAINING RECEPTOR 3	0	11.5825	7.45617	25.5973
ENSG00000128052	KDR	VASCULAR ENDOTHELIAL GROWTH FACTOR RECEPTOR 2	1.66376	2.43842	0.233005	5.6883
ENSG00000169330	KIAA1024	MAJOR INTRINSICALLY DISORDERED NOTCH2-BINDING RECEPTOR 1	83.5001	74.6766	0	0
ENSG00000157404	KIT	MAST/STEM CELL GROWTH FACTOR RECEPTOR KIT	10.1906	33.0711	59.4163	82.4803
ENSG00000139187	KLRG1	KILLER CELL LECTIN-LIKE RECEPTOR SUBFAMILY G MEMBER 1	3.22354	13.8685	0	31.2856
ENSG00000188883	KLRG2	KILLER CELL LECTIN-LIKE RECEPTOR SUBFAMILY G MEMBER 2	6.3431	4.57204	0	0
ENSG00000178177	LCORL	LIGAND-DEPENDENT NUCLEAR RECEPTOR COREPRESSOR-LIKE PROTEIN	3.95144	7.77246	0	99.5452
ENSG00000130164	LDLR	LOW-DENSITY LIPOPROTEIN RECEPTOR	102.217	92.3552	0	22.7532
ENSG00000179241	LDLRAD3	LOW-DENSITY LIPOPROTEIN RECEPTOR CLASS A DOMAIN-CONTAINING PROTEIN 3	21.9409	2.28602	0	93.8569
ENSG00000168675	LDLRAD4	LOW-DENSITY LIPOPROTEIN RECEPTOR CLASS A DOMAIN-CONTAINING PROTEIN 4	251.124	302.212	310.596	136.519
ENSG00000157978	LDLRAP1	LOW DENSITY LIPOPROTEIN RECEPTOR ADAPTER PROTEIN 1	12.4782	0	30.2907	2.84415
ENSG00000105617	LENG1	LEUKOCYTE RECEPTOR CLUSTER MEMBER 1	3.95144	1.82881	10.9512	14.2207
ENSG00000167615	LENG8	LEUKOCYTE RECEPTOR CLUSTER MEMBER 8	179.686	330.101	481.622	287.259
ENSG00000116678	LEPR	LEPTIN RECEPTOR	41.906	20.4218	20.5045	45.5064
ENSG00000104660	LEPROTL1	LEPTIN RECEPTOR OVERLAPPING TRANSCRIPT-LIKE 1	64.9908	37.1859	0.233005	22.7532
ENSG00000205213	LGR4	LEUCINE-RICH REPEAT-CONTAINING G-PROTEIN COUPLED RECEPTOR 4	41.4901	51.0544	37.5138	0
ENSG00000139292	LGR5	LEUCINE-RICH REPEAT-CONTAINING G-PROTEIN COUPLED RECEPTOR 5	1.35181	13.2589	21.4365	8.53245
ENSG00000113594	LIFR	LEUKEMIA INHIBITORY FACTOR RECEPTOR	128.318	87.9355	60.5814	127.987
ENSG00000244482	LILRA6	LEUKOCYTE IMMUNOGLOBULIN-LIKE RECEPTOR SUBFAMILY A MEMBER 6-RELATED	0	0	6.29114	17.0649
ENSG00000204577	LILRB3	LEUKOCYTE IMMUNOGLOBULIN-LIKE RECEPTOR SUBFAMILY A MEMBER 6-RELATED	2.49565	0	6.52415	8.53245
ENSG00000169783	LINGO1	LEUCINE-RICH REPEAT AND IMMUNOGLOBULIN-LIKE DOMAIN-CONTAINING NOGO RECEPTOR-INTERACTING PROTEIN 1	55.8401	52.7308	8.62119	28.4415
ENSG00000220008	LINGO3	LEUCINE-RICH REPEAT AND IMMUNOGLOBULIN-LIKE DOMAIN-CONTAINING NOGO RECEPTOR-INTERACTING PROTEIN 3	2.18369	0	58.2513	85.3245
ENSG00000198121	LPAR1	LYSOPHOSPHATIDIC ACID RECEPTOR 1	21.7329	4.72444	38.9119	36.9739
ENSG00000064547	LPAR2	LYSOPHOSPHATIDIC ACID RECEPTOR 2	1.55978	5.79125	0	22.7532
ENSG00000139679	LPAR6	LYSOPHOSPHATIDIC ACID RECEPTOR 6	5.51122	8.53447	0	8.53245
ENSG00000121931	LRIF1	LIGAND-DEPENDENT NUCLEAR RECEPTOR-INTERACTING FACTOR 1	6.65505	7.92486	8.62119	14.2207
ENSG00000123384	LRP1	PROLOW-DENSITY LIPOPROTEIN RECEPTOR-RELATED PROTEIN 1	717.498	658.221	1078.12	878.842
ENSG00000197324	LRP10	LOW-DENSITY LIPOPROTEIN RECEPTOR-RELATED PROTEIN 10	20.0691	15.5449	23.9995	17.0649
ENSG00000120256	LRP11	LOW-DENSITY LIPOPROTEIN RECEPTOR-RELATED PROTEIN 11	3.43151	5.48644	0	42.6622
ENSG00000147650	LRP12	LDL receptor related protein 12 [Source:HGNC Symbol;Acc:HGNC:31708]	45.3376	42.5199	68.2705	170.649
ENSG00000168702	LRP1B	LOW-DENSITY LIPOPROTEIN RECEPTOR-RELATED PROTEIN 1B	1247.51	1249.23	328.304	184.87
ENSG00000081479	LRP2	LOW-DENSITY LIPOPROTEIN RECEPTOR-RELATED PROTEIN 2	6.44708	0.457204	54.2902	14.2207
ENSG00000130881	LRP3	LOW-DENSITY LIPOPROTEIN RECEPTOR-RELATED PROTEIN 3	44.4017	46.1776	107.415	85.3245
ENSG00000134569	LRP4	LOW-DENSITY LIPOPROTEIN RECEPTOR-RELATED PROTEIN 4	31.5075	49.6828	36.1158	105.234
ENSG00000100068	LRP5L	LOW-DENSITY LIPOPROTEIN RECEPTOR-RELATED PROTEIN 5-RELATED	2.0797	0	25.1646	31.2856
ENSG00000070018	LRP6	LOW-DENSITY LIPOPROTEIN RECEPTOR-RELATED PROTEIN 6	96.6023	86.5639	128.852	71.1037
ENSG00000157193	LRP8	LOW-DENSITY LIPOPROTEIN RECEPTOR-RELATED PROTEIN 8	147.347	134.723	99.2602	199.09
ENSG00000105699	LSR	LIPOLYSIS-STIMULATED LIPOPROTEIN RECEPTOR	13.4141	3.96243	24.9316	39.8181
ENSG00000213903	LTB4R	LEUKOTRIENE B4 RECEPTOR 1	0.935867	5.02924	14.9123	51.1947
ENSG00000062524	LTK	LEUKOCYTE TYROSINE KINASE RECEPTOR	0.415941	0	30.2907	14.2207
ENSG00000133800	LYVE1	LYMPHATIC VESSEL ENDOTHELIAL HYALURONIC ACID RECEPTOR 1	2.0797	3.35283	0.233005	28.4415
ENSG00000003056	M6PR	CATION-DEPENDENT MANNOSE-6-PHOSPHATE RECEPTOR	42.9459	17.9833	57.0863	14.2207
ENSG00000258839	MC1R	MELANOCYTE-STIMULATING HORMONE RECEPTOR	3.95144	12.4969	9.55321	19.909
ENSG00000166603	MC4R	MELANOCORTIN RECEPTOR 4	180.31	158.04	21.2035	0
ENSG00000105976	MET	HEPATOCYTE GROWTH FACTOR RECEPTOR	14.8699	13.4113	0.233005	0
ENSG00000135324	MRAP2	MELANOCORTIN-2 RECEPTOR ACCESSORY PROTEIN 2	41.1781	25.7558	21.6695	0
ENSG00000011028	MRC2	C-TYPE MANNOSE RECEPTOR 2	5.40723	7.77246	39.1449	17.0649
ENSG00000164078	MST1R	MACROPHAGE-STIMULATING PROTEIN RECEPTOR	2.39166	3.04802	7.45617	68.2596
ENSG00000084676	NCOA1	NUCLEAR RECEPTOR COACTIVATOR 1	161.385	173.28	312.693	73.9479
ENSG00000140396	NCOA2	NUCLEAR RECEPTOR COACTIVATOR 2	154.73	219.458	167.531	116.61
ENSG00000124151	NCOA3	NUCLEAR RECEPTOR COACTIVATOR 3	49.081	53.3404	13.2813	139.363
ENSG00000266412	NCOA4	NUCLEAR RECEPTOR COACTIVATOR 4	122.183	102.109	54.5232	59.7271
ENSG00000124160	NCOA5	NUCLEAR RECEPTOR COACTIVATOR 5	34.2111	19.5074	0.233005	113.766
ENSG00000198646	NCOA6	NUCLEAR RECEPTOR COACTIVATOR 6	74.6614	76.8102	85.2799	39.8181
ENSG00000111912	NCOA7	NUCLEAR RECEPTOR COACTIVATOR 7	297.398	296.116	78.0568	179.181
ENSG00000141027	NCOR1	NUCLEAR RECEPTOR COREPRESSOR 1-RELATED	164.193	244.452	234.869	307.168
ENSG00000196498	NCOR2	NUCLEAR RECEPTOR COREPRESSOR 2	442.873	531.271	203.647	93.8569
ENSG00000188211	NCR3LG1	NATURAL CYTOTOXICITY TRIGGERING RECEPTOR 3 LIGAND 1	59.5835	68.4282	68.2705	76.792
ENSG00000135577	NMBR	NEUROMEDIN-B RECEPTOR	20.1731	16.7641	0	0
ENSG00000132911	NMUR2	NEUROMEDIN-U RECEPTOR 2	0	0	19.5724	14.2207
ENSG00000159899	NPR2	ATRIAL NATRIURETIC PEPTIDE RECEPTOR 2	23.2927	8.99167	12.3493	25.5973
ENSG00000221890	NPTXR	NEURONAL PENTRAXIN RECEPTOR	135.805	171.604	84.3479	28.4415
ENSG00000164128	NPY1R	NEUROPEPTIDE Y RECEPTOR TYPE 1	16.7416	18.8978	41.0089	110.922
ENSG00000164129	NPY5R	NEUROPEPTIDE Y RECEPTOR TYPE 5	1.24782	4.26723	40.3099	2.84415
ENSG00000226306	NPY6R	NEUROPEPTIDE Y RECEPTOR TYPE 6-RELATED	2.0797	13.7161	13.9803	17.0649
ENSG00000126368	NR1D1	NUCLEAR RECEPTOR SUBFAMILY 1 GROUP D MEMBER 1	4.47136	5.02924	51.4942	5.6883
ENSG00000174738	NR1D2	NUCLEAR RECEPTOR SUBFAMILY 1 GROUP D MEMBER 2	113.656	88.3927	67.8045	54.0388
ENSG00000131408	NR1H2	OXYSTEROLS RECEPTOR LXR-BETA	34.5231	24.2318	0.233005	25.5973
ENSG00000025434	NR1H3	OXYSTEROLS RECEPTOR LXR-ALPHA	1.24782	7.92486	0	153.584
ENSG00000143257	NR1I3	NUCLEAR RECEPTOR SUBFAMILY 1 GROUP I MEMBER 3	0	0	14.6793	14.2207
ENSG00000120798	NR2C1	NUCLEAR RECEPTOR SUBFAMILY 2 GROUP C MEMBER 1	29.0119	48.7684	17.0094	25.5973
ENSG00000177463	NR2C2	NUCLEAR RECEPTOR SUBFAMILY 2 GROUP C MEMBER 2	98.8899	121.159	206.676	45.5064
ENSG00000160113	NR2F6	NUCLEAR RECEPTOR SUBFAMILY 2 GROUP F MEMBER 6	15.0779	28.1942	0.46601	28.4415
ENSG00000113580	NR3C1	GLUCOCORTICOID RECEPTOR	46.8973	46.1776	30.2907	31.2856
ENSG00000151623	NR3C2	MINERALOCORTICOID RECEPTOR	24.8525	32.1567	8.8542	0
ENSG00000123358	NR4A1	NUCLEAR RECEPTOR SUBFAMILY 4 GROUP A MEMBER 1	22.7728	27.5846	50.3291	36.9739
ENSG00000119508	NR4A3	NUCLEAR RECEPTOR SUBFAMILY 4 GROUP A MEMBER 3	1.76775	8.83927	25.6306	59.7271
ENSG00000148200	NR6A1	NUCLEAR RECEPTOR SUBFAMILY 6 GROUP A MEMBER 1	26.2043	30.4802	6.52415	8.53245
ENSG00000148572	NRBF2	NUCLEAR RECEPTOR-BINDING FACTOR 2	24.8525	10.6681	12.1163	2.84415
ENSG00000115216	NRBP1	NUCLEAR RECEPTOR-BINDING PROTEIN	68.2143	87.4783	25.6306	88.1686
ENSG00000185189	NRBP2	NUCLEAR RECEPTOR-BINDING PROTEIN 2	106.065	137.314	116.27	28.4415
ENSG00000180530	NRIP1	NUCLEAR RECEPTOR-INTERACTING PROTEIN 1	148.595	163.222	34.9508	68.2596
ENSG00000053702	NRIP2	NUCLEAR RECEPTOR-INTERACTING PROTEIN 2	5.82317	2.28602	22.8345	28.4415
ENSG00000175352	NRIP3	NUCLEAR RECEPTOR-INTERACTING PROTEIN 3	473.237	221.287	105.085	108.078
ENSG00000165802	NSMF	NMDA RECEPTOR SYNAPTONUCLEAR SIGNALING AND NEURONAL MIGRATION FACTOR	106.273	122.226	104.153	221.844
ENSG00000198400	NTRK1	HIGH AFFINITY NERVE GROWTH FACTOR RECEPTOR	344.087	235.155	0	0
ENSG00000148053	NTRK2	BDNF/NT-3 GROWTH FACTORS RECEPTOR	170.64	195.074	236.034	381.116
ENSG00000140538	NTRK3	NT-3 GROWTH FACTOR RECEPTOR	341.175	358.905	670.822	716.726
ENSG00000169006	NTSR2	NEUROTENSIN RECEPTOR TYPE 2	3.11956	0	6.29114	34.1298
ENSG00000060491	OGFR	OPIOID GROWTH FACTOR RECEPTOR	54.9042	104.395	68.5035	56.883
ENSG00000119900	OGFRL1	OPIOID GROWTH FACTOR RECEPTOR-LIKE PROTEIN 1	68.8382	76.353	106.017	179.181
ENSG00000182057	OGFRP1	opioid growth factor receptor pseudogene 1 [Source:HGNC Symbol;Acc:HGNC:50511]	51.4727	52.2736	32.6207	68.2596
ENSG00000116329	OPRD1	DELTA-TYPE OPIOID RECEPTOR	527.101	475.644	84.3479	0
ENSG00000082556	OPRK1	KAPPA-TYPE OPIOID RECEPTOR	8.63077	10.9729	0	108.078
ENSG00000112038	OPRM1	MU-TYPE OPIOID RECEPTOR	10.7105	22.2506	35.8828	125.143
ENSG00000170790	OR10A2	OLFACTORY RECEPTOR 10A2	6.23911	16.6117	56.3873	22.7532
ENSG00000197309	OR10D3	OLFACTORY RECEPTOR 10D3-RELATED	3.84745	12.9541	0	0
ENSG00000235248	OR13C1P	olfactory receptor family 13 subfamily C member 1 pseudogene [Source:HGNC Symbol;Acc:HGNC:14699]	2.70362	5.48644	0	0
ENSG00000168828	OR13J1	OLFACTORY RECEPTOR 13J1	1.66376	1.82881	20.0385	0
ENSG00000171496	OR1L8	OLFACTORY RECEPTOR 1L8	3.11956	2.59082	0	0
ENSG00000279486	OR2AG1	OLFACTORY RECEPTOR 2AG1	3.84745	4.11483	23.7665	22.7532
ENSG00000187080	OR2AK2	OLFACTORY RECEPTOR 2AK2	4.57535	1.37161	11.6503	0
ENSG00000171561	OR2AT4	OLFACTORY RECEPTOR 2AT4	0	2.74322	14.6793	25.5973
ENSG00000204657	OR2H2	OLFACTORY RECEPTOR 2H2	6.55107	16.6117	37.7468	11.3766
ENSG00000196071	OR2L13	OLFACTORY RECEPTOR 2L13	6.86302	11.1253	0	8.53245
ENSG00000224227	OR2L1P	olfactory receptor family 2 subfamily L member 1 pseudogene [Source:HGNC Symbol;Acc:HGNC:8265]	3.63948	3.96243	0	0
ENSG00000198128	OR2L3	OLFACTORY RECEPTOR 2L3	3.74347	6.24845	16.0774	0
ENSG00000197454	OR2L5	OLFACTORY RECEPTOR 2L5	8.4228	5.94365	19.8054	0
ENSG00000228198	OR2M3	OLFACTORY RECEPTOR 2M3	5.82317	9.29648	0	34.1298
ENSG00000171180	OR2M4	OLFACTORY RECEPTOR 2M4	6.13513	11.4301	0	17.0649
ENSG00000162727	OR2M5	OLFACTORY RECEPTOR 2M5	1.87173	2.89562	0	0
ENSG00000184933	OR6A2	OLFACTORY RECEPTOR 6A2	7.07099	4.72444	11.4173	31.2856
ENSG00000188269	OR7A5	OLFACTORY RECEPTOR 7A5	2.39166	2.74322	0	0
ENSG00000238228	OR7E7P	olfactory receptor family 7 subfamily E member 7 pseudogene [Source:HGNC Symbol;Acc:HGNC:8457]	2.70362	3.81003	0	0
ENSG00000196119	OR8A1	OLFACTORY RECEPTOR 8A1	17.8855	36.4239	0	0
ENSG00000254646	OR8B10P	olfactory receptor family 8 subfamily B member 10 pseudogene [Source:HGNC Symbol;Acc:HGNC:14751]	3.11956	2.89562	0	0
ENSG00000227737	OR8B1P	olfactory receptor family 8 subfamily B member 1 pseudogene [Source:HGNC Symbol;Acc:HGNC:8470]	5.30325	16.3069	0	0
ENSG00000284680	OR8B2	OLFACTORY RECEPTOR 8B2-RELATED	1.03985	14.6305	0	0
ENSG00000255030	OR8B5P	olfactory receptor family 8 subfamily B member 5 pseudogene [Source:HGNC Symbol;Acc:HGNC:8474]	2.91159	3.04802	0	0
ENSG00000197125	OR8B8	OLFACTORY RECEPTOR 8B8	10.3985	21.4886	0	0
ENSG00000229386	OR8B9P	olfactory receptor family 8 subfamily B member 9 pseudogene [Source:HGNC Symbol;Acc:HGNC:14746]	12.4782	28.9562	0	28.4415
ENSG00000229254	OR8C1P	olfactory receptor family 8 subfamily C member 1 pseudogene [Source:HGNC Symbol;Acc:HGNC:8478]	1.87173	6.24845	0	0
ENSG00000196341	OR8D1	OLFACTORY RECEPTOR 8D1	25.0604	46.9396	0	0
ENSG00000279116	OR8D2	OLFACTORY RECEPTOR 8D2	3.74347	1.98122	0	0
ENSG00000255048	OR8X1P	olfactory receptor family 8 subfamily X member 1 pseudogene [Source:HGNC Symbol;Acc:HGNC:31318]	5.82317	3.04802	0	0
ENSG00000145623	OSMR	ONCOSTATIN-M-SPECIFIC RECEPTOR SUBUNIT BETA	1.45579	13.4113	0	11.3766
ENSG00000180914	OXTR	OXYTOCIN RECEPTOR	18.5094	53.6452	0	25.5973
ENSG00000108405	P2RX1	P2X purinoceptor 1	0	0.152401	0	0
ENSG00000135124	P2RX4	P2X purinoceptor 4	8.11085	7.01046	37.0478	48.3505
ENSG00000083454	P2RX5	P2X purinoceptor 5	9.98258	0	14.2133	0
ENSG00000099957	P2RX6	P2X purinoceptor 6	20.0691	32.0043	26.0966	56.883
ENSG00000089041	P2RX7	P2X purinoceptor 7	21.005	33.5283	81.5518	14.2207
ENSG00000169860	P2RY1	P2Y purinoceptor 1	0	12.0397	0	28.4415
ENSG00000244165	P2RY11	P2Y purinoceptor 11	4.36738	8.22967	20.0385	0
ENSG00000169313	P2RY12	P2Y purinoceptor 12	9.35867	17.9833	0	45.5064
ENSG00000174944	P2RY14	P2Y purinoceptor 14	6.23911	0	17.0094	0
ENSG00000163291	PAQR3	PROGESTIN AND ADIPOQ RECEPTOR FAMILY MEMBER 3	83.8121	69.1902	92.2701	25.5973
ENSG00000162073	PAQR4	PROGESTIN AND ADIPOQ RECEPTOR FAMILY MEMBER 4	3.43151	7.31526	18.6404	0
ENSG00000137819	PAQR5	MEMBRANE PROGESTIN RECEPTOR GAMMA	1.35181	9.75368	0	0
ENSG00000160781	PAQR6	MEMBRANE PROGESTIN RECEPTOR DELTA	5.82317	3.20043	12.5823	19.909
ENSG00000182749	PAQR7	MEMBRANE PROGESTIN RECEPTOR ALPHA	11.2304	18.4406	0.699016	2.84415
ENSG00000170915	PAQR8	MEMBRANE PROGESTIN RECEPTOR BETA	51.2647	56.9981	100.891	82.4803
ENSG00000134853	PDGFRA	PLATELET-DERIVED GROWTH FACTOR RECEPTOR ALPHA	13.83	5.79125	10.0192	0
ENSG00000113721	PDGFRB	PLATELET-DERIVED GROWTH FACTOR RECEPTOR BETA	4.67933	8.22967	15.3783	25.5973
ENSG00000187800	PEAR1	PLATELET ENDOTHELIAL AGGREGATION RECEPTOR 1	3.5355	2.59082	0.233005	0
ENSG00000139197	PEX5	PEROXISOMAL TARGETING SIGNAL 1 RECEPTOR	64.8868	74.6766	119.066	36.9739
ENSG00000112357	PEX7	PEROXISOMAL TARGETING SIGNAL 2 RECEPTOR	4.57535	2.43842	0	0
ENSG00000101856	PGRMC1	MEMBRANE-ASSOCIATED PROGESTERONE RECEPTOR COMPONENT 1	241.142	202.389	114.173	5.6883
ENSG00000164040	PGRMC2	MEMBRANE-ASSOCIATED PROGESTERONE RECEPTOR COMPONENT 2	42.8419	94.3364	30.2907	42.6622
ENSG00000085514	PILRA	PAIRED IMMUNOGLOBULIN-LIKE TYPE 2 RECEPTOR ALPHA	0.103985	0	56.8533	36.9739
ENSG00000121716	PILRB	PAIRED IMMUNOGLOBULIN-LIKE TYPE 2 RECEPTOR BETA	19.5492	3.65763	29.5917	0
ENSG00000250251	PKD1P6	polycystin 1, transient receptor potential channel interacting pseudogene 6 [Source:HGNC Symbol;Acc:HGNC:30070]	7.48694	11.5825	26.0966	11.3766
ENSG00000153246	PLA2R1	SECRETORY PHOSPHOLIPASE A2 RECEPTOR	29.3238	20.879	25.6306	28.4415
ENSG00000011422	PLAUR	UROKINASE PLASMINOGEN ACTIVATOR SURFACE RECEPTOR	1.97572	7.16286	17.2424	22.7532
ENSG00000107020	PLGRKT	PLASMINOGEN RECEPTOR (KT)	3.32753	1.82881	0	2.84415
ENSG00000146278	PNRC1	PROLINE-RICH NUCLEAR RECEPTOR COACTIVATOR 1	58.6477	39.3195	9.78622	39.8181
ENSG00000189266	PNRC2	PROLINE-RICH NUCLEAR RECEPTOR COACTIVATOR 2	31.1956	35.2047	13.7473	17.0649
ENSG00000186951	PPARA	PEROXISOME PROLIFERATOR-ACTIVATED RECEPTOR ALPHA	6.96701	8.07727	38.4459	17.0649
ENSG00000112033	PPARD	PEROXISOME PROLIFERATOR-ACTIVATED RECEPTOR DELTA	22.0449	27.737	24.4656	14.2207
ENSG00000109819	PPARGC1A	PEROXISOME PROLIFERATOR-ACTIVATED RECEPTOR GAMMA COACTIVATOR 1-ALPHA	28.8039	15.6973	113.474	0
ENSG00000155846	PPARGC1B	PEROXISOME PROLIFERATOR-ACTIVATED RECEPTOR GAMMA COACTIVATOR 1-BETA	48.1452	16.4593	147.259	224.688
ENSG00000214140	PRCD	PHOTORECEPTOR DISK COMPONENT PRCD	8.94273	8.22967	17.2424	0
ENSG00000119973	PRLHR	PROLACTIN-RELEASING PEPTIDE RECEPTOR	114.072	92.66	0	0
ENSG00000113494	PRLR	PROLACTIN RECEPTOR	0	0	22.3685	54.0388
ENSG00000134247	PTGFRN	PROSTAGLANDIN F2 RECEPTOR NEGATIVE REGULATOR	26.9322	11.5825	24.4656	19.909
ENSG00000160801	PTH1R	PARATHYROID HORMONE/PARATHYROID HORMONE-RELATED PEPTIDE RECEPTOR	2.70362	3.04802	5.35912	34.1298
ENSG00000132670	PTPRA	RECEPTOR-TYPE TYROSINE-PROTEIN PHOSPHATASE ALPHA	414.173	375.669	120.231	159.272
ENSG00000127329	PTPRB	RECEPTOR-TYPE TYROSINE-PROTEIN PHOSPHATASE BETA	27.6601	47.5492	21.4365	42.6622
ENSG00000153707	PTPRD	RECEPTOR-TYPE TYROSINE-PROTEIN PHOSPHATASE DELTA	162.425	119.787	359.294	312.856
ENSG00000132334	PTPRE	RECEPTOR-TYPE TYROSINE-PROTEIN PHOSPHATASE EPSILON	13.83	0	98.0952	82.4803
ENSG00000142949	PTPRF	RECEPTOR-TYPE TYROSINE-PROTEIN PHOSPHATASE F	545.506	436.172	206.676	238.909
ENSG00000144724	PTPRG	RECEPTOR-TYPE TYROSINE-PROTEIN PHOSPHATASE GAMMA	130.917	136.552	112.775	224.688
ENSG00000149177	PTPRJ	RECEPTOR-TYPE TYROSINE-PROTEIN PHOSPHATASE ETA	73.3096	66.4469	29.1257	116.61
ENSG00000152894	PTPRK	RECEPTOR-TYPE TYROSINE-PROTEIN PHOSPHATASE KAPPA	16.8456	13.1065	0	48.3505
ENSG00000173482	PTPRM	RECEPTOR-TYPE TYROSINE-PROTEIN PHOSPHATASE MU	137.364	88.6975	204.113	108.078
ENSG00000054356	PTPRN	RECEPTOR-TYPE TYROSINE-PROTEIN PHOSPHATASE-LIKE N	659.266	494.847	382.129	196.246
ENSG00000155093	PTPRN2	RECEPTOR-TYPE TYROSINE-PROTEIN PHOSPHATASE N2	471.677	333.759	438.05	93.8569
ENSG00000151490	PTPRO	RECEPTOR-TYPE TYROSINE-PROTEIN PHOSPHATASE O	5.51122	0	163.803	56.883
ENSG00000153233	PTPRR	RECEPTOR-TYPE TYROSINE-PROTEIN PHOSPHATASE R	52.5125	62.0273	3.72808	85.3245
ENSG00000105426	PTPRS	RECEPTOR-TYPE TYROSINE-PROTEIN PHOSPHATASE S	1535.03	1482.86	364.42	133.675
ENSG00000196090	PTPRT	RECEPTOR-TYPE TYROSINE-PROTEIN PHOSPHATASE T	8.83874	27.1274	232.073	162.117
ENSG00000060656	PTPRU	RECEPTOR-TYPE TYROSINE-PROTEIN PHOSPHATASE U	15.2858	13.2589	15.6114	14.2207
ENSG00000106278	PTPRZ1	RECEPTOR-TYPE TYROSINE-PROTEIN PHOSPHATASE ZETA	53.5524	63.2465	148.657	59.7271
ENSG00000073008	PVR	POLIOVIRUS RECEPTOR	62.9111	43.1296	37.9799	2.84415
ENSG00000186867	QRFPR	PYROGLUTAMYLATED RF-AMIDE PEPTIDE RECEPTOR	1.35181	12.0397	0	0
ENSG00000204628	RACK1	RECEPTOR OF ACTIVATED PROTEIN C KINASE 1	123.846	94.946	124.891	119.454
ENSG00000132329	RAMP1	RECEPTOR ACTIVITY-MODIFYING PROTEIN 1	0	2.74322	29.8247	19.909
ENSG00000131759	RARA	RETINOIC ACID RECEPTOR ALPHA	12.6862	14.9353	4.89311	0
ENSG00000077092	RARB	RETINOIC ACID RECEPTOR BETA	3.01557	8.38207	43.106	48.3505
ENSG00000172819	RARG	RETINOIC ACID RECEPTOR GAMMA	2.59963	5.79125	19.1064	25.5973
ENSG00000106538	RARRES2	RETINOIC ACID RECEPTOR RESPONDER PROTEIN 2	3.32753	2.59082	0.699016	0
ENSG00000133321	RARRES3	RETINOIC ACID RECEPTOR RESPONDER PROTEIN 3	1.35181	3.35283	0	8.53245
ENSG00000068615	REEP1	RECEPTOR EXPRESSION-ENHANCING PROTEIN 1	333.065	398.072	133.745	91.0128
ENSG00000132563	REEP2	RECEPTOR EXPRESSION-ENHANCING PROTEIN 2	314.659	238.203	76.1927	110.922
ENSG00000165476	REEP3	RECEPTOR EXPRESSION-ENHANCING PROTEIN 3	8.31882	13.5637	17.2424	5.6883
ENSG00000129625	REEP5	RECEPTOR EXPRESSION-ENHANCING PROTEIN 5	548.002	503.229	255.141	102.389
ENSG00000165731	RET	PROTO-ONCOGENE TYROSINE-PROTEIN KINASE RECEPTOR RET	12.2703	24.689	0	0
ENSG00000137275	RIPK1	RECEPTOR-INTERACTING SERINE/THREONINE-PROTEIN KINASE 1	17.2615	19.2026	17.0094	51.1947
ENSG00000104312	RIPK2	RECEPTOR-INTERACTING SERINE/THREONINE-PROTEIN KINASE 2	4.15941	0	20.5045	25.5973
ENSG00000185483	ROR1	INACTIVE TYROSINE-PROTEIN KINASE TRANSMEMBRANE RECEPTOR ROR1	1.87173	2.74322	4.4271	2.84415
ENSG00000069667	RORA	NUCLEAR RECEPTOR ROR-ALPHA	20.4851	6.55325	145.162	68.2596
ENSG00000198963	RORB	NUCLEAR RECEPTOR ROR-BETA	4.15941	19.0502	0	0
ENSG00000180245	RRH	VISUAL PIGMENT-LIKE RECEPTOR PEROPSIN	3.01557	0	13.9803	5.6883
ENSG00000040608	RTN4R	RETICULON-4 RECEPTOR	23.0847	13.1065	0	28.4415
ENSG00000185924	RTN4RL1	RETICULON-4 RECEPTOR-LIKE 1	32.4434	18.8978	4.4271	34.1298
ENSG00000188011	RTP5	RECEPTOR-TRANSPORTING PROTEIN 5	2.39166	3.20043	40.3099	59.7271
ENSG00000186350	RXRA	RETINOIC ACID RECEPTOR RXR-ALPHA	17.8855	29.7182	53.8242	108.078
ENSG00000204231	RXRB	RETINOIC ACID RECEPTOR RXR-BETA	46.7933	52.8832	76.1927	65.4154
ENSG00000143171	RXRG	RETINOIC ACID RECEPTOR RXR-GAMMA	6.86302	2.59082	0	19.909
ENSG00000196218	RYR1	RYANODINE RECEPTOR 1	52.3046	73.7622	89.474	170.649
ENSG00000198626	RYR2	RYANODINE RECEPTOR 2	897.288	1004.02	1665.75	1163.26
ENSG00000198838	RYR3	RYANODINE RECEPTOR 3	55.944	97.8416	1532.48	1126.28
ENSG00000170989	S1PR1	SPHINGOSINE 1-PHOSPHATE RECEPTOR 1	2.8076	4.11483	3.02907	36.9739
ENSG00000213694	S1PR3	SPHINGOSINE 1-PHOSPHATE RECEPTOR 3	2.18369	0.152401	14.6793	65.4154
ENSG00000168077	SCARA3	SCAVENGER RECEPTOR CLASS A MEMBER 3	2.0797	13.2589	40.3099	17.0649
ENSG00000073060	SCARB1	SCAVENGER RECEPTOR CLASS B MEMBER 1	59.6875	42.2151	178.016	122.298
ENSG00000074660	SCARF1	SCAVENGER RECEPTOR CLASS F MEMBER 1	5.82317	6.24845	11.4173	0
ENSG00000214279	SCART1	scavenger receptor family member expressed on T cells 1 [Source:HGNC Symbol;Acc:HGNC:32411]	3.5355	9.75368	13.2813	0
ENSG00000185187	SIGIRR	SINGLE IG IL-1-RELATED RECEPTOR	12.8942	5.79125	0	5.6883
ENSG00000147955	SIGMAR1	SIGMA NON-OPIOID INTRACELLULAR RECEPTOR 1	26.7242	10.8205	34.9508	5.6883
ENSG00000108018	SORCS1	VPS10 DOMAIN-CONTAINING RECEPTOR SORCS1	4.15941	42.0627	226.015	167.805
ENSG00000184985	SORCS2	VPS10 DOMAIN-CONTAINING RECEPTOR SORCS2	18.9253	46.0252	59.4163	164.961
ENSG00000156395	SORCS3	VPS10 DOMAIN-CONTAINING RECEPTOR SORCS3	22.5648	28.0418	52.1932	22.7532
ENSG00000137642	SORL1	SORTILIN-RELATED RECEPTOR	232.719	177.547	182.21	142.207
ENSG00000213523	SRA1	STEROID RECEPTOR RNA ACTIVATOR 1	17.9894	20.7266	15.8444	14.2207
ENSG00000182934	SRPRA	SIGNAL RECOGNITION PARTICLE RECEPTOR SUBUNIT ALPHA	58.9596	38.2527	64.0764	65.4154
ENSG00000144867	SRPRB	SIGNAL RECOGNITION PARTICLE RECEPTOR SUBUNIT BETA	56.9839	25.7558	0.233005	0
ENSG00000235374	SSR4P1	signal sequence receptor subunit 4 pseudogene 1 [Source:HGNC Symbol;Acc:HGNC:23131]	2.28767	5.63885	0	0
ENSG00000180616	SSTR2	SOMATOSTATIN RECEPTOR TYPE 2	3.74347	7.01046	19.1064	45.5064
ENSG00000278195	SSTR3	SOMATOSTATIN RECEPTOR TYPE 3	12.5822	26.8226	0	0
ENSG00000115353	TACR1	SUBSTANCE-P RECEPTOR	853.407	582.782	27.9606	8.53245
ENSG00000075073	TACR2	SUBSTANCE-K RECEPTOR	4.15941	8.38207	0	0
ENSG00000169962	TAS1R3	TASTE RECEPTOR TYPE 1 MEMBER 3	2.91159	1.37161	37.2808	11.3766
ENSG00000212128	TAS2R13	TASTE RECEPTOR TYPE 2 MEMBER 13	6.75904	17.6785	0	0
ENSG00000212124	TAS2R19	TASTE RECEPTOR TYPE 2 MEMBER 19	2.28767	2.89562	0	36.9739
ENSG00000127362	TAS2R3	TASTE RECEPTOR TYPE 2 MEMBER 3	1.87173	7.16286	25.6306	19.909
ENSG00000256188	TAS2R30	TASTE RECEPTOR TYPE 2 MEMBER 30	3.74347	8.53447	0	0
ENSG00000256436	TAS2R31	TASTE RECEPTOR TYPE 2 MEMBER 31	7.69491	11.7349	7.68917	0
ENSG00000127364	TAS2R4	TASTE RECEPTOR TYPE 2 MEMBER 4	6.23911	12.9541	19.8054	34.1298
ENSG00000226761	TAS2R46	TASTE RECEPTOR TYPE 2 MEMBER 46	2.28767	6.24845	0	0
ENSG00000256019	TAS2R63P	taste 2 receptor member 63 pseudogene [Source:HGNC Symbol;Acc:HGNC:20641]	4.15941	10.9729	0	0
ENSG00000120156	TEK	ANGIOPOIETIN-1 RECEPTOR	8.83874	8.38207	15.8444	19.909
ENSG00000106327	TFR2	TRANSFERRIN RECEPTOR PROTEIN 2	1.97572	4.87684	5.12612	2.84415
ENSG00000072274	TFRC	TRANSFERRIN RECEPTOR PROTEIN 1	35.9789	31.5471	54.9892	327.077
ENSG00000106799	TGFBR1	TGF-BETA RECEPTOR TYPE-1	42.218	42.0627	0.46601	62.5713
ENSG00000163513	TGFBR2	TGF-BETA RECEPTOR TYPE-2	12.1663	0.457204	12.1163	8.53245
ENSG00000126351	THRA	THYROID HORMONE RECEPTOR ALPHA	126.238	108.662	203.647	85.3245
ENSG00000151090	THRB	THYROID HORMONE RECEPTOR BETA	32.9633	92.8124	118.6	34.1298
ENSG00000181847	TIGIT	T-CELL IMMUNORECEPTOR WITH IG AND ITIM DOMAINS	2.59963	5.18164	0	2.84415
ENSG00000150455	TIRAP	TOLL/INTERLEUKIN-1 RECEPTOR DOMAIN-CONTAINING ADAPTER PROTEIN	4.05542	1.37161	0.233005	0
ENSG00000136869	TLR4	TOLL-LIKE RECEPTOR 4	18.8213	31.2423	60.3484	105.234
ENSG00000149932	TMEM219	INSULIN-LIKE GROWTH FACTOR-BINDING PROTEIN 3 RECEPTOR	33.1713	25.9082	27.7276	25.5973
ENSG00000109084	TMEM97	SIGMA INTRACELLULAR RECEPTOR 2	21.9409	14.3257	0	0
ENSG00000120889	TNFRSF10B	TUMOR NECROSIS FACTOR RECEPTOR SUPERFAMILY MEMBER 10B	4.57535	0	14.6793	48.3505
ENSG00000157873	TNFRSF14	TUMOR NECROSIS FACTOR RECEPTOR SUPERFAMILY MEMBER 14	7.48694	1.52401	0.46601	56.883
ENSG00000127863	TNFRSF19	TUMOR NECROSIS FACTOR RECEPTOR SUPERFAMILY MEMBER 19	1.55978	10.0585	0	0
ENSG00000028137	TNFRSF1B	TUMOR NECROSIS FACTOR RECEPTOR SUPERFAMILY MEMBER 1B	0.831882	0.152401	9.78622	19.909
ENSG00000146072	TNFRSF21	TUMOR NECROSIS FACTOR RECEPTOR SUPERFAMILY MEMBER 21	148.595	139.904	48.2321	48.3505
ENSG00000215788	TNFRSF25	TUMOR NECROSIS FACTOR RECEPTOR SUPERFAMILY MEMBER 25	11.9583	16.1545	54.9892	73.9479
ENSG00000186827	TNFRSF4	TUMOR NECROSIS FACTOR RECEPTOR SUPERFAMILY MEMBER 4	0	0	6.29114	8.53245
ENSG00000120949	TNFRSF8	TUMOR NECROSIS FACTOR RECEPTOR SUPERFAMILY MEMBER 8	0	0	24.2325	22.7532
ENSG00000173726	TOMM20	MITOCHONDRIAL IMPORT RECEPTOR SUBUNIT TOM20 HOMOLOG	219.825	142.495	164.036	105.234
ENSG00000100216	TOMM22	MITOCHONDRIAL IMPORT RECEPTOR SUBUNIT TOM22 HOMOLOG	27.5561	13.2589	8.8542	0
ENSG00000025772	TOMM34	MITOCHONDRIAL IMPORT RECEPTOR SUBUNIT TOM34	21.213	13.4113	36.5818	25.5973
ENSG00000130204	TOMM40	MITOCHONDRIAL IMPORT RECEPTOR SUBUNIT TOM40 HOMOLOG	50.8488	29.7182	41.2419	76.792
ENSG00000158882	TOMM40L	MITOCHONDRIAL IMPORT RECEPTOR SUBUNIT TOM40B	17.2615	15.2401	7.92218	8.53245
ENSG00000175768	TOMM5	MITOCHONDRIAL IMPORT RECEPTOR SUBUNIT TOM5 HOMOLOG	5.6152	8.83927	0	62.5713
ENSG00000196683	TOMM7	MITOCHONDRIAL IMPORT RECEPTOR SUBUNIT TOM7 HOMOLOG	29.8438	10.3633	0.46601	45.5064
ENSG00000154174	TOMM70	MITOCHONDRIAL IMPORT RECEPTOR SUBUNIT TOM70	139.34	144.324	119.765	236.064
ENSG00000277734	TRAC	T cell receptor alpha constant [Source:HGNC Symbol;Acc:HGNC:12029]	0.103985	2.13362	5.12612	22.7532
ENSG00000281103	TRG-AS1	T cell receptor gamma locus antisense RNA 1 [Source:HGNC Symbol;Acc:HGNC:48974]	1.87173	3.04802	0	2.84415
ENSG00000100815	TRIP11	THYROID RECEPTOR-INTERACTING PROTEIN 11	81.7324	71.781	30.5237	31.2856
ENSG00000087077	TRIP6	THYROID RECEPTOR-INTERACTING PROTEIN 6	2.0797	2.74322	0	17.0649
ENSG00000144935	TRPC1	SHORT TRANSIENT RECEPTOR POTENTIAL CHANNEL 1	56.9839	96.47	109.978	36.9739
ENSG00000138741	TRPC3	SHORT TRANSIENT RECEPTOR POTENTIAL CHANNEL 3	1410.87	1075.8	28.4266	0
ENSG00000133107	TRPC4	SHORT TRANSIENT RECEPTOR POTENTIAL CHANNEL 4	39.3064	78.1818	0	0
ENSG00000072315	TRPC5	SHORT TRANSIENT RECEPTOR POTENTIAL CHANNEL 5	42.6339	33.5283	0	0
ENSG00000069018	TRPC7	SHORT TRANSIENT RECEPTOR POTENTIAL CHANNEL 7	55.1122	46.9396	0	0
ENSG00000134160	TRPM1	TRANSIENT RECEPTOR POTENTIAL CATION CHANNEL SUBFAMILY M MEMBER 1	0.519926	0	7.22316	25.5973
ENSG00000142185	TRPM2	TRANSIENT RECEPTOR POTENTIAL CATION CHANNEL SUBFAMILY M MEMBER 2	68.4223	89.0023	336.926	372.584
ENSG00000083067	TRPM3	TRANSIENT RECEPTOR POTENTIAL CATION CHANNEL SUBFAMILY M MEMBER 3	81.2125	125.883	16.0774	59.7271
ENSG00000130529	TRPM4	TRANSIENT RECEPTOR POTENTIAL CATION CHANNEL SUBFAMILY M MEMBER 4	35.5629	27.8894	0.46601	54.0388
ENSG00000119121	TRPM6	TRANSIENT RECEPTOR POTENTIAL CATION CHANNEL SUBFAMILY M MEMBER 6	4.15941	1.37161	1.39803	0
ENSG00000092439	TRPM7	TRANSIENT RECEPTOR POTENTIAL CATION CHANNEL SUBFAMILY M MEMBER 7	56.6719	111.405	184.54	164.961
ENSG00000196689	TRPV1	TRANSIENT RECEPTOR POTENTIAL CATION CHANNEL SUBFAMILY V MEMBER 1	13.5181	19.5074	0	0
ENSG00000187688	TRPV2	TRANSIENT RECEPTOR POTENTIAL CATION CHANNEL SUBFAMILY V MEMBER 2	8.31882	7.01046	0	19.909
ENSG00000167723	TRPV3	TRANSIENT RECEPTOR POTENTIAL CATION CHANNEL SUBFAMILY V MEMBER 3	7.79889	2.13362	64.0764	0
ENSG00000165125	TRPV6	TRANSIENT RECEPTOR POTENTIAL CATION CHANNEL SUBFAMILY V MEMBER 6	1.45579	0	41.7079	48.3505
ENSG00000165409	TSHR	THYROTROPIN RECEPTOR	1.66376	8.83927	46.368	93.8569
ENSG00000092445	TYRO3	TYROSINE-PROTEIN KINASE RECEPTOR TYRO3	130.293	112.777	190.831	25.5973
ENSG00000113763	UNC5A	NETRIN RECEPTOR UNC5A	29.7398	21.9458	166.133	68.2596
ENSG00000107731	UNC5B	NETRIN RECEPTOR UNC5B	48.3531	46.4824	38.6789	5.6883
ENSG00000182168	UNC5C	NETRIN RECEPTOR UNC5C	219.721	269.445	42.1739	0
ENSG00000156687	UNC5D	NETRIN RECEPTOR UNC5D	161.385	180.443	44.737	54.0388
ENSG00000114812	VIPR1	VASOACTIVE INTESTINAL POLYPEPTIDE RECEPTOR 1	2.91159	0	99.0272	2.84415
ENSG00000147852	VLDLR	VERY LOW-DENSITY LIPOPROTEIN RECEPTOR	24.2286	22.7078	74.3287	19.909
ENSG00000178201	VN1R1	VOMERONASAL TYPE-1 RECEPTOR 1	8.4228	12.9541	0	0
ENSG00000228038	VN1R51P	vomeronasal 1 receptor 51 pseudogene [Source:HGNC Symbol;Acc:HGNC:37371]	0.831882	0	48.4651	34.1298
ENSG00000182093	WRB	TAIL-ANCHORED PROTEIN INSERTION RECEPTOR WRB	36.9148	38.4051	21.6695	5.6883
ENSG00000143324	XPR1	XENOTROPIC AND POLYTROPIC RETROVIRUS RECEPTOR 1	184.886	129.084	50.5621	25.5973
ENSG00000171606	ZNF274	NEUROTROPHIN RECEPTOR-INTERACTING FACTOR HOMOLOG	12.1663	7.01046	19.3394	22.7532
ENSG00000286220		purinergic receptor P2X, ligand-gated ion channel, 7 (P2RX7) pseudogene	1.76775	8.99167	30.2907	0

## Sheet: All genes
All genes
Gene symbol	Gene description	ChIN #21	ChIN #22	SPN #21	SPN #22
A1BG-AS1		1.66376	0	0	0
A1CF	APOBEC1 complementation factor;A1CF	0.831882	0	0	36.9739
A2M	Alpha-2-macroglobulin;A2M	13.2061	16.9165	55.2222	159.272
A2M-AS1		2.8076	0	0	5.6883
A2ML1	Alpha-2-macroglobulin-like protein 1;A2ML1	2.39166	0.152401	0.699016	0
A2MP1		2.49565	0	0	0
A4GNT	Alpha-1,4-N-acetylglucosaminyltransferase;A4GNT	0.311956	0	0	0
AAAS	Aladin;AAAS	13.1021	21.641	56.6203	14.2207
AACS	Acetoacetyl-CoA synthetase;AACS	55.944	55.7789	72.6976	36.9739
AACSP1		1.55978	0	0	11.3766
AADACL2	Arylacetamide deacetylase-like 2;AADACL2	0	0.152401	0.699016	0
AADACL3	Arylacetamide deacetylase-like 3;AADACL3	0	0	0	22.7532
AADAT	Kynurenine/alpha-aminoadipate aminotransferase, mitochondrial;AADAT	5.6152	0	0	0
AAGAB	Alpha- and gamma-adaptin-binding protein p34;AAGAB	63.535	68.5806	54.5232	0
AAK1	AP2-associated protein kinase 1;AAK1	555.489	698.15	502.825	375.428
AAMDC	Mth938 domain-containing protein;AAMDC	1.03985	0	13.2813	36.9739
AAMP	Angio-associated migratory cell protein;AAMP	75.5972	72.6954	80.6198	28.4415
AANAT	Serotonin N-acetyltransferase;AANAT	1.55978	0	0	0
AAR2	Protein AAR2 homolog;AAR2	26.5162	11.7349	0.233005	48.3505
AARD	Alanine and arginine-rich domain-containing protein;AARD	2.18369	7.31526	0.233005	0
AARS1	Alanine--tRNA ligase, cytoplasmic;AARS	368.316	344.884	216.928	241.753
AARS2	Alanine--tRNA ligase, mitochondrial;AARS2	21.8369	35.2047	17.4754	17.0649
AARSD1	Alanyl-tRNA editing protein Aarsd1;AARSD1	2.49565	4.87684	0	0
AASDH	Beta-alanine-activating enzyme;AASDH	20.5891	32.6139	36.5818	8.53245
AASDHPPT	L-aminoadipate-semialdehyde dehydrogenase-phosphopantetheinyl transferase;AASDHPPT	90.9871	64.6181	43.106	65.4154
AASS	Alpha-aminoadipic semialdehyde synthase, mitochondrial;AASS	30.3637	21.4886	86.911	2.84415
AATBC		4.26339	15.2401	29.8247	14.2207
AATF	Protein AATF;AATF	17.9894	16.4593	0.233005	42.6622
AATK	Serine/threonine-protein kinase LMTK1;AATK	228.975	122.531	543.834	267.35
ABALON		3.11956	3.96243	0	0
ABAT	4-aminobutyrate aminotransferase, mitochondrial;ABAT	312.788	274.322	171.958	281.571
ABCA1	ATP-binding cassette sub-family A member 1;ABCA1	19.9652	35.0523	57.5523	127.987
ABCA10	ATP-binding cassette sub-family A member 10;ABCA10	24.4365	26.0606	19.8054	19.909
ABCA11P		10.3985	0	0	0
ABCA12	ATP-binding cassette sub-family A member 12;ABCA12	0	0.304802	0	0
ABCA17P		5.71919	4.26723	0	22.7532
ABCA2	ATP-binding cassette sub-family A member 2;ABCA2	473.237	358.6	829.033	301.48
ABCA3	ATP-binding cassette sub-family A member 3;ABCA3	321.002	244.909	165.201	56.883
ABCA4	Retinal-specific ATP-binding cassette transporter;ABCA4	1.14384	0	0	0
ABCA5	ATP-binding cassette sub-family A member 5;ABCA5	139.028	183.186	157.745	116.61
ABCA6	ATP-binding cassette sub-family A member 6;ABCA6	23.0847	60.9605	0.233005	68.2596
ABCA7	ATP-binding cassette sub-family A member 7;ABCA7	69.4621	130.455	22.8345	56.883
ABCA8	ATP-binding cassette sub-family A member 8;ABCA8	38.0586	22.8602	33.3197	85.3245
ABCA9	ATP-binding cassette sub-family A member 9;ABCA9	18.6134	15.8497	7.68917	19.909
ABCB1	Multidrug resistance protein 1;ABCB1	0	3.20043	0	105.234
ABCB10		19.7572	9.90608	54.5232	5.6883
ABCB10P1		0	3.50523	0	0
ABCB11	Bile salt export pump;ABCB11	0.415941	0	5.82513	0
ABCB4	Phosphatidylcholine translocator ABCB4;ABCB4	3.11956	0	5.35912	36.9739
ABCB6	ATP-binding cassette sub-family B member 6, mitochondrial;ABCB6	15.9097	13.8685	41.4749	71.1037
ABCB7	ATP-binding cassette sub-family B member 7, mitochondrial;ABCB7	19.1333	20.5742	39.8439	0
ABCB8	ATP-binding cassette sub-family B member 8, mitochondrial;ABCB8	46.4814	39.4719	219.491	79.6362
ABCB9	ATP-binding cassette sub-family B member 9;ABCB9	85.8918	79.4011	100.192	2.84415
ABCC1	Multidrug resistance-associated protein 1;ABCC1	45.2336	53.95	53.3582	59.7271
ABCC10	Multidrug resistance-associated protein 7;ABCC10	38.4745	74.3718	86.911	68.2596
ABCC11	ATP-binding cassette sub-family C member 11;ABCC11	3.11956	0.609605	0.46601	19.909
ABCC12	Multidrug resistance-associated protein 9;ABCC12	0	0	0.233005	62.5713
ABCC13		2.28767	0.152401	0	0
ABCC2	Canalicular multispecific organic anion transporter 1;ABCC2	0	0	0	36.9739
ABCC3	Canalicular multispecific organic anion transporter 2;ABCC3	0	0	0.233005	8.53245
ABCC4	Multidrug resistance-associated protein 4;ABCC4	2.0797	10.0585	0	0
ABCC5	Multidrug resistance-associated protein 5;ABCC5	350.43	473.206	274.48	386.804
ABCC5-AS1		2.8076	0	0	0
ABCC6	Multidrug resistance-associated protein 6;ABCC6	6.13513	0	0	0
ABCC8	ATP-binding cassette sub-family C member 8;ABCC8	9.1507	76.0482	154.715	102.389
ABCC9	ATP-binding cassette sub-family C member 9;ABCC9	0.831882	0	0.233005	54.0388
ABCD1	ATP-binding cassette sub-family D member 1;ABCD1	2.49565	7.16286	10.0192	22.7532
ABCD2	ATP-binding cassette sub-family D member 2;ABCD2	20.0691	11.8873	0	0
ABCD3	ATP-binding cassette sub-family D member 3;ABCD3	47.0013	64.6181	29.5917	2.84415
ABCD4	ATP-binding cassette sub-family D member 4;ABCD4	49.289	105.309	92.7361	159.272
ABCE1	ATP-binding cassette sub-family E member 1;ABCE1	66.3426	53.188	0	14.2207
ABCF1	ATP-binding cassette sub-family F member 1;ABCF1	52.8245	64.4657	0.233005	5.6883
ABCF2	ATP-binding cassette sub-family F member 2;ABCF2	22.6688	25.451	0	31.2856
ABCF2P1		2.18369	0	0	8.53245
ABCF2P2		0.415941	0	0	0
ABCF3	ATP-binding cassette sub-family F member 3;ABCF3	97.1222	98.756	57.7853	96.7011
ABCG1	ATP-binding cassette sub-family G member 1;ABCG1	67.1744	75.2862	104.153	119.454
ABCG2	ATP-binding cassette sub-family G member 2;ABCG2	8.83874	2.59082	9.55321	45.5064
ABCG4	ATP-binding cassette sub-family G member 4;ABCG4	48.6651	39.7767	13.7473	0
ABCG5	ATP-binding cassette sub-family G member 5;ABCG5	0	3.04802	0	0
ABCG8	ATP-binding cassette sub-family G member 8;ABCG8	3.11956	4.11483	0	0
ABHD1	Protein ABHD1;ABHD1	1.87173	10.0585	0	0
ABHD10	Mycophenolic acid acyl-glucuronide esterase, mitochondrial;ABHD10	28.9079	31.2423	51.7272	0
ABHD11	Protein ABHD11;ABHD11	6.55107	1.37161	6.05814	0
ABHD11-AS1		0	0	0	31.2856
ABHD12	Lysophosphatidylserine lipase ABHD12;ABHD12	141.108	119.787	23.0675	159.272
ABHD12B	Protein ABHD12B;ABHD12B	0	0.152401	14.6793	42.6622
ABHD13	Protein ABHD13;ABHD13	22.6688	21.4886	0	17.0649
ABHD14A	Protein ABHD14A;ABHD14A	17.5735	4.87684	0	5.6883
ABHD14B	Protein ABHD14B;ABHD14B	6.55107	0.152401	8.15518	0
ABHD15	Protein ABHD15;ABHD15	0.727896	14.9353	0	0
ABHD16A	Phosphatidylserine lipase ABHD16A;ABHD16A	2.59963	0	19.1064	19.909
ABHD17A	Alpha/beta hydrolase domain-containing protein 17A;ABHD17A	25.4764	23.6222	54.2902	51.1947
ABHD17AP1		0	2.74322	0.233005	0
ABHD17AP3		0	0	0	5.6883
ABHD17AP6		0.831882	0	0	0
ABHD17B	Alpha/beta hydrolase domain-containing protein 17B;ABHD17B	23.0847	22.8602	37.0478	31.2856
ABHD17C	Alpha/beta hydrolase domain-containing protein 17C;ABHD17C	6.23911	0	12.5823	0
ABHD18	Protein ABHD18;ABHD18	19.5492	30.023	82.9499	96.7011
ABHD2	Monoacylglycerol lipase ABHD2;ABHD2	187.901	123.75	184.074	156.428
ABHD3	Phospholipase ABHD3;ABHD3	6.44708	22.8602	0.932021	71.1037
ABHD4	Protein ABHD4;ABHD4	12.8942	8.38207	0.46601	45.5064
ABHD5	1-acylglycerol-3-phosphate O-acyltransferase ABHD5;ABHD5	12.6862	37.1859	27.7276	36.9739
ABHD6	Monoacylglycerol lipase ABHD6;ABHD6	38.0586	48.0064	2.33005	0
ABHD8	Protein ABHD8;ABHD8	15.8058	24.3842	26.5626	8.53245
ABI1	Abl interactor 1;ABI1	58.1277	32.4615	83.1829	22.7532
ABI1P1		0	1.52401	0	0
ABI2	Abl interactor 2;ABI2	296.254	254.205	479.525	312.856
ABI3	ABI gene family member 3;ABI3	3.11956	0	0	0
ABI3BP	Target of Nesh-SH3;ABI3BP	0.831882	2.13362	0	0
ABITRAM	Protein Abitram;ABITRAM	10.1906	5.48644	35.6498	2.84415
ABITRAMP1		0.103985	0	0	0
ABL1	Tyrosine-protein kinase ABL1;ABL1	51.3687	57.1505	134.211	36.9739
ABL2	Tyrosine-protein kinase ABL2;ABL2	101.906	89.0023	192.695	122.298
ABLIM1	Actin-binding LIM protein 1;ABLIM1	103.361	71.6286	301.742	423.778
ABLIM2	Actin-binding LIM protein 2;ABLIM2	51.5767	43.282	275.645	167.805
ABLIM3	Actin-binding LIM protein 3;ABLIM3	103.673	105.309	26.5626	45.5064
ABO		0.519926	0.152401	0	0
ABR	Active breakpoint cluster region-related protein;ABR	831.466	706.989	408.924	284.415
ABRA	Actin-binding Rho-activating protein;ABRA	0	0	0	11.3766
ABRACL	Costars family protein ABRACL;ABRACL	2.39166	3.04802	0	0
ABRAXAS1	BRCA1-A complex subunit Abraxas 1;ABRAXAS1	8.4228	7.01046	25.1646	8.53245
ABRAXAS2	BRISC complex subunit Abraxas 2;ABRAXAS2	32.7553	30.023	0	11.3766
ABT1	Activator of basal transcription 1;ABT1	17.9894	14.4781	0	59.7271
ABTB1	Ankyrin repeat and BTB/POZ domain-containing protein 1;ABTB1	31.8195	16.9165	174.754	218.999
ABTB2	Ankyrin repeat and BTB/POZ domain-containing protein 2;ABTB2	38.2666	26.5178	14.4463	14.2207
AC000029.2		0	0	31.9217	0
AC000058.1		0	5.94365	0	0
AC000065.1		5.71919	5.94365	53.5912	45.5064
AC000065.2		6.13513	0	49.1641	11.3766
AC000068.1		1.03985	0	0	0
AC000072.1		5.6152	0	0	0
AC000078.1		3.43151	0	0	0
AC000081.1		0.831882	0	0	0
AC000093.1		11.3344	0	0	0
AC000095.3		3.5355	2.28602	0	0
AC000120.2		1.35181	5.18164	0.233005	0
AC000123.2		2.49565	0	0	0
AC000123.3		13.934	40.3863	0	51.1947
AC000372.1		1.24782	0	0	0
AC000374.1		0	0	20.2715	0
AC000403.1		0	3.96243	0	0
AC001226.1		1.03985	0	0	0
AC001226.2	Uncharacterized protein (Fragment);unassigned	5.71919	5.33404	84.5809	39.8181
AC001226.2	Uncharacterized protein (Fragment);unassigned	5.71919	5.33404	84.5809	39.8181
AC001226.2	Uncharacterized protein (Fragment);unassigned	5.71919	5.33404	84.5809	39.8181
AC001226.2	Uncharacterized protein (Fragment);unassigned	5.71919	5.33404	84.5809	39.8181
AC002056.1		0.20797	0	0	0
AC002064.2		2.28767	1.37161	0	0
AC002064.3		0.103985	6.09605	14.2133	0
AC002069.2		0	15.5449	0	0
AC002069.3		2.59963	0	0	0
AC002069.4		0.519926	7.92486	0	0
AC002073.1		0.623911	0	0	0
AC002091.2		0	0	0	2.84415
AC002094.5		0	1.82881	0.233005	0
AC002101.1		1.24782	0	0	0
AC002115.1		1.03985	0	0	0
AC002128.1		5.51122	5.79125	0	14.2207
AC002310.2		0.311956	0	0	0
AC002310.5		1.24782	3.04802	0	0
AC002316.1	Rap1 GTPase-activating protein 2;RAP1GAP2	52.8245	42.0627	46.135	48.3505
AC002347.1		0.519926	0	0	0
AC002350.2		2.91159	9.29648	0	0
AC002377.1		0	13.5637	0	0
AC002381.1		0.831882	0	0	0
AC002400.1		6.96701	0	24.2325	0
AC002401.1		4.15941	0	0	0
AC002428.2		0	6.24845	0	0
AC002429.2		1.45579	0	8.62119	0
AC002451.1		1.97572	0	0	0
AC002456.1		0	0	16.7764	17.0649
AC002458.1		2.8076	14.7829	0	0
AC002460.1		0.727896	0	0	0
AC002460.2		1.66376	0.762006	0	0
AC002467.1		4.57535	0	0	0
AC002504.1		0.103985	0	0	0
AC002511.1		3.74347	0	0	0
AC002511.2		1.24782	0	0	0
AC002519.2		0	0	0.233005	0
AC002524.1		0.103985	0	0	0
AC002542.1		1.97572	0	0	0
AC002542.6		2.91159	0	0	0
AC002543.1		1.76775	3.65763	20.7375	0
AC002545.1		0	0	0.932021	0
AC002546.1		2.28767	0	0	0
AC002551.1		0.415941	0	0	5.6883
AC002553.1		2.39166	0	18.1744	0
AC002553.2		2.70362	0	25.3976	0
AC002558.1		0	3.50523	0	0
AC002558.3		6.23911	6.55325	36.5818	0
AC002563.1		1.55978	0	0	8.53245
AC002981.1		0.727896	0	0	0
AC002984.1		0	3.81003	0	0
AC003001.2		1.45579	0	0	0
AC003002.2	Uncharacterized protein (Fragment);unassigned	1.97572	0	0	0
AC003002.3	Uncharacterized protein (Fragment);unassigned	1.35181	0	21.9025	0
AC003005.2		0.727896	0	0	0
AC003043.3		0	7.31526	0	0
AC003044.1		0	0	9.32021	0
AC003045.1		0	0	0	19.909
AC003072.1		0	2.59082	0	0
AC003077.1		2.39166	4.41964	46.8341	11.3766
AC003084.1		0	1.21921	0	0
AC003086.1		2.8076	2.13362	0	0
AC003093.1		0.519926	0	0	2.84415
AC003101.1		0	0.457204	0	0
AC003102.1		0.831882	4.57204	5.59213	17.0649
AC003657.1		2.49565	0	0	0
AC003681.1		55.7361	63.8561	61.2804	73.9479
AC003682.1		0	4.11483	0	0
AC003688.3		1.24782	0	0	0
AC003956.1		0.311956	0	0	0
AC003989.1		2.39166	0	0	0
AC003989.2		3.5355	0	0	0
AC003991.1		3.32753	0.152401	0	0
AC003991.2		1.03985	3.20043	0	0
AC004014.2		1.35181	0	0	0
AC004023.1		2.18369	0	13.5143	0
AC004024.1		0.831882	0	0	0
AC004034.1		1.97572	0	0	0
AC004039.1		3.84745	0	11.4173	0
AC004047.1		0.20797	0.152401	0.233005	0
AC004054.1		0	0	0	42.6622
AC004057.1		0	0	29.3587	0
AC004067.1		0.935867	0	0	0
AC004076.2		12.2703	17.5261	0	34.1298
AC004083.1		2.39166	6.85806	0	0
AC004130.1		0.831882	0	0	0
AC004134.1		0	0	0	14.2207
AC004147.1		3.43151	13.4113	21.4365	0
AC004147.2		12.9982	0	24.6986	0
AC004147.3		9.35867	6.70565	0	0
AC004147.4		4.26339	10.9729	21.6695	0
AC004147.5		9.8786	6.70565	17.4754	8.53245
AC004148.1		7.48694	0	18.1744	0
AC004151.1	Rho GTPase-activating protein 45;ARHGAP45	4.57535	10.3633	17.9414	39.8181
AC004156.1		0	5.63885	0.233005	0
AC004158.1		7.69491	9.14407	19.3394	0
AC004160.1		1.87173	8.07727	0	0
AC004160.2		1.24782	0	0	0
AC004217.1		0	0	23.7665	0
AC004217.2		1.03985	4.72444	0	0
AC004221.1		0.935867	0	10.9512	39.8181
AC004223.1		1.03985	0	0	0
AC004223.2		0.935867	0	0	25.5973
AC004223.4		0.831882	8.68687	0	0
AC004224.1		0.415941	0	0	0
AC004232.2		1.14384	5.02924	0	0
AC004233.2		0.831882	2.59082	34.2518	14.2207
AC004233.3		1.03985	4.11483	0	0
AC004241.1		0.727896	2.74322	0	0
AC004241.3		1.14384	1.67641	0	0
AC004241.5		4.05542	4.57204	14.9123	0
AC004253.1		1.14384	0	0	0
AC004263.2		4.05542	2.74322	0	0
AC004381.3		0	6.55325	0	0
AC004383.1		0	1.67641	0	0
AC004386.1		0.103985	0	0	0
AC004408.1		0	0	14.6793	0
AC004408.2		0	0	12.5823	0
AC004448.2		0	3.20043	15.3783	5.6883
AC004449.1		1.66376	0	0	0
AC004453.1		0.103985	0	0	0
AC004453.2		2.59963	0	6.99016	0
AC004461.3		0.935867	0	0	0
AC004466.3		2.0797	0	0	0
AC004467.1		1.24782	0	0	0
AC004470.1		0.727896	0	0	0
AC004470.2		3.43151	7.01046	0	0
AC004471.1		1.14384	2.74322	0	0
AC004477.1		2.8076	3.65763	0	0
AC004477.3		3.43151	0	0	0
AC004490.1		0.831882	0	17.2424	17.0649
AC004491.1		2.0797	1.06681	0	0
AC004492.1		3.74347	0	0	0
AC004494.1		0	0	0	19.909
AC004522.3		0	0	0.233005	0
AC004522.4		0.727896	5.63885	0	0
AC004540.1		22.2528	9.29648	47.5331	0
AC004540.2		7.07099	15.2401	0	0
AC004549.1		0.935867	0	0	0
AC004584.3		2.70362	4.72444	0	34.1298
AC004593.1		2.18369	4.41964	0	0
AC004596.1		2.18369	0	0	0
AC004623.1		0	0	21.4365	0
AC004637.1		0	0	0	17.0649
AC004672.1		0	0	31.4557	0
AC004672.2		1.55978	0	19.1064	19.909
AC004674.1		5.82317	0	167.997	0
AC004674.2		2.70362	0	34.4848	0
AC004678.1		0.103985	0	0	0
AC004678.2		1.03985	0.152401	0	0
AC004687.2		0	5.33404	0	48.3505
AC004687.3		1.35181	1.52401	8.38819	0
AC004692.2		1.35181	0	0	0
AC004696.1		0	3.65763	0	0
AC004696.2		2.18369	0	0	0
AC004706.1		0	0	4.89311	0
AC004706.3		9.46265	5.94365	44.504	0
AC004707.1		0.519926	0	0	0
AC004765.1		9.35867	0	8.38819	0
AC004771.1		1.45579	0	0	0
AC004771.2		0.935867	0	0	0
AC004771.4		0.831882	0	0	0
AC004775.1		1.35181	0	0	0
AC004801.4		0.103985	0	0	0
AC004803.1		4.99129	0	20.9705	39.8181
AC004805.2		1.55978	0	0	0
AC004805.3		2.0797	1.37161	0	0
AC004808.2		2.39166	0.762006	0	0
AC004812.1		3.22354	0	0	0
AC004812.2		5.92716	0	11.6503	0
AC004816.1		8.4228	10.0585	0	19.909
AC004817.4		4.78332	9.14407	10.0192	0
AC004817.5		0	0	0	39.8181
AC004825.3		1.45579	0	0	22.7532
AC004828.2		0	0.152401	0	0
AC004832.1		0.935867	0	0	0
AC004840.2		0.103985	0.152401	0	0
AC004846.2		3.22354	0	0	0
AC004852.2		0	0	22.3685	0
AC004854.2		1.03985	0	0	0
AC004858.1		1.24782	0	0	0
AC004862.1		1.45579	0	0	0
AC004865.1		2.8076	3.20043	0	39.8181
AC004865.2		1.55978	0	21.6695	31.2856
AC004877.2		0	0	5.35912	0
AC004882.2		4.26339	0	0	0
AC004884.1		0.103985	0	0	0
AC004884.2		0	0	3.26207	0
AC004888.1		0.519926	0	0	0
AC004890.2		8.21483	15.0877	0	0
AC004890.3		1.14384	0	0	0
AC004893.1		6.03114	0	0	0
AC004893.3		0.727896	0	0	0
AC004898.1		0.831882	0	0	0
AC004900.1		0	0	0	19.909
AC004908.1		2.49565	0	0	0
AC004912.1		2.59963	0	0	0
AC004918.1		1.24782	0	0	0
AC004918.5		3.43151	5.63885	19.8054	0
AC004922.1		1.03985	0	0	0
AC004923.1		0	2.74322	0	0
AC004925.1		0.727896	0	0	0
AC004930.1		0	0	7.45617	0
AC004938.2		3.43151	0	0	0
AC004941.1		0	1.98122	0	0
AC004941.2		1.97572	0	0	0
AC004943.2		6.75904	8.68687	4.19409	0
AC004944.1		2.28767	0	0	0
AC004945.1		1.97572	0	0	0
AC004947.1		0	0.304802	0	31.2856
AC004947.2		32.0274	25.451	9.0872	22.7532
AC004948.1		2.28767	0	0	0
AC004951.2		1.24782	0	3.26207	0
AC004951.4		3.01557	0	0	0
AC004965.1		0	2.89562	0	0
AC004967.2		0.623911	3.20043	0	28.4415
AC004974.1		1.45579	0	13.9803	0
AC004980.1		8.73476	9.75368	40.0769	0
AC004980.3		0	0.152401	0	0
AC004980.5		0.727896	0	0	0
AC004982.1		13.5181	0	0	0
AC004982.2		6.03114	14.6305	0	0
AC004988.1		0	0	0	22.7532
AC005005.1		0.103985	0.152401	0	0
AC005005.4		0.20797	0	0	25.5973
AC005006.1		0.935867	0	0	0
AC005011.1		1.03985	0	0	0
AC005013.1		0	3.81003	0	0
AC005014.1		0	0.152401	0	0
AC005014.4		1.55978	7.16286	0	17.0649
AC005019.2		0.311956	0	9.78622	0
AC005020.1		1.35181	8.68687	0	17.0649
AC005021.1		0	2.59082	0	0
AC005034.3		0	3.04802	0	0
AC005034.5		0	7.77246	0	0
AC005034.6		0.519926	0	0	0
AC005034.7		0	0	0.233005	0
AC005040.1		0	0	10.9512	0
AC005040.2		1.55978	0	6.75715	0
AC005041.1		7.38295	22.403	40.3099	59.7271
AC005041.3		0	0	0	2.84415
AC005042.1		0	0	0	5.6883
AC005046.2		1.87173	0	0	0
AC005052.2		1.14384	0	0	0
AC005070.2		2.18369	0	0	0
AC005070.3		10.5025	26.3654	30.9897	0
AC005072.1		2.18369	5.94365	0	0
AC005076.2		1.87173	0	0	0
AC005076.3		0	0	13.7473	0
AC005077.2		0	8.22967	18.1744	0
AC005077.4		0	1.82881	13.0483	0
AC005081.1		1.76775	0	0	25.5973
AC005082.1		0	0	0	5.6883
AC005083.1		0	0	0	25.5973
AC005084.1		0.831882	0	0	0
AC005086.1		0	0	0	34.1298
AC005086.2		0.727896	0	0	0
AC005086.3		0.103985	0	0	0
AC005086.5		0	0	5.35912	0
AC005089.1		2.59963	8.68687	0	0
AC005104.2		1.24782	4.11483	0	0
AC005104.3		1.03985	0	0	0
AC005153.1		1.45579	0	11.4173	0
AC005154.1		0	3.04802	0	0
AC005154.2		2.59963	2.59082	21.6695	0
AC005162.1		0	0	0	25.5973
AC005162.2		0	13.1065	0	142.207
AC005165.1		1.03985	4.72444	10.9512	0
AC005165.3		0.311956	5.02924	0	0
AC005183.1		1.76775	2.28602	21.6695	0
AC005197.1		1.97572	0	0	0
AC005209.1		0	0	0	2.84415
AC005225.1		0.623911	0	0.233005	0
AC005225.2		0.519926	4.26723	21.6695	5.6883
AC005225.4		0.311956	0	0	0
AC005229.1		0	0.152401	0	0
AC005229.4		1.55978	3.96243	0	0
AC005230.1		2.18369	0	10.9512	0
AC005234.1		0.727896	9.44888	0	0
AC005234.2		0.727896	8.68687	0	0
AC005237.1		0	1.98122	0	0
AC005244.1		2.0797	0	0	0
AC005252.3		1.14384	0	0	0
AC005253.1		0	12.1921	0	0
AC005261.1	Zinc finger protein 304;ZNF304	19.7572	18.4406	7.92218	2.84415
AC005261.2		56.7759	52.8832	67.3385	102.389
AC005261.3		0.20797	0	0	0
AC005261.6		8.63077	11.4301	0	0
AC005277.2		0	0	12.3493	0
AC005288.1		0	0.457204	0	0
AC005291.2		1.35181	0	0	0
AC005293.1		7.59092	8.53447	47.0671	39.8181
AC005304.1		1.97572	0	0	0
AC005304.2		4.05542	0	14.2133	22.7532
AC005304.3		2.28767	0	10.0192	0
AC005326.1		0	0	0	31.2856
AC005329.3		4.47136	2.59082	0	0
AC005330.1		1.97572	6.40085	0	0
AC005332.1		1.66376	3.81003	0	0
AC005332.2		2.39166	3.81003	0	0
AC005332.3		0	3.50523	0	0
AC005332.4		2.18369	0	0	0
AC005332.5		3.01557	0	10.4852	0
AC005332.6		15.3898	31.5471	0	0
AC005332.7		1.87173	0	0	0
AC005336.1		0	0	0	8.53245
AC005336.2		0.103985	0	0	0
AC005343.1		3.11956	15.5449	0	0
AC005344.1		5.92716	0	0	0
AC005351.1		0.103985	0	0	0
AC005357.2		2.49565	0	0	0
AC005358.1		0.103985	0	0	0
AC005379.1		0.935867	0	0	0
AC005387.1		1.35181	0	0	0
AC005391.1		0	0.152401	0	5.6883
AC005394.2		1.03985	0	7.45617	51.1947
AC005400.1		0	2.89562	0	0
AC005412.1		1.14384	0	16.3104	0
AC005414.1		5.71919	3.81003	0	0
AC005479.1		0	2.28602	0	19.909
AC005480.1		0	0.152401	0	0
AC005481.1		17.6775	30.9375	31.9217	5.6883
AC005495.1		5.40723	3.35283	7.92218	0
AC005495.2		0.831882	3.50523	0	0
AC005498.2		1.45579	0	0	0
AC005498.3		2.70362	4.57204	0	0
AC005514.1		0.727896	0	0	0
AC005518.2		0	7.46766	18.6404	0
AC005519.1		1.66376	14.1733	0	0
AC005520.4		3.84745	0	0	0
AC005520.5		2.39166	0	0	0
AC005520.7		1.55978	0	16.7764	0
AC005521.1		0.727896	0	0	0
AC005524.1		1.66376	0	0	0
AC005529.1		0.623911	0	0	0
AC005532.1		0.415941	2.59082	0	0
AC005534.1		1.76775	0	0	0
AC005534.2		1.24782	0	0	0
AC005537.2		0	5.48644	0	0
AC005539.1		2.18369	0	0	0
AC005540.1		4.36738	5.02924	0	0
AC005544.1		2.49565	0	0	0
AC005546.1		0	4.72444	0	0
AC005549.1		0	6.85806	0	0
AC005559.1		0.831882	0	0	0
AC005562.1		2.49565	0	3.02907	0
AC005586.1		0	0	13.9803	0
AC005588.1		4.57535	0	0	0
AC005599.1		1.35181	0	0	0
AC005606.2		0.311956	3.96243	0	11.3766
AC005614.1		0	0	39.8439	0
AC005618.1		0	5.48644	0	62.5713
AC005622.1		0	3.20043	0	0
AC005632.3		0	2.59082	15.6114	0
AC005632.6		3.5355	25.1462	22.3685	65.4154
AC005670.3		29.7398	36.8811	76.4257	125.143
AC005674.1		1.45579	0	0	0
AC005674.2		7.17498	2.28602	0	68.2596
AC005691.1		1.03985	0	0	0
AC005692.1		2.91159	15.6973	0	0
AC005692.2		1.14384	0	0	0
AC005692.3		12.7902	27.1274	0	0
AC005695.1		0	1.21921	0	0
AC005695.2		1.14384	0	0	0
AC005695.3		0	5.18164	0	0
AC005696.1		0	3.04802	0	0
AC005696.3		1.76775	0	0	0
AC005696.4		12.9982	25.6034	33.0867	0
AC005697.2		2.0797	0	0	0
AC005699.1		3.11956	0	0	17.0649
AC005702.2		0.20797	0	0	0
AC005722.3		0	0	6.05814	0
AC005725.1		0	0	0	17.0649
AC005726.2		1.24782	0	0	42.6622
AC005730.1		1.66376	0	0	0
AC005730.2		2.18369	0	0	0
AC005740.1		0.103985	0	0	0
AC005740.3		0	2.59082	0	0
AC005740.5		2.70362	4.26723	0	22.7532
AC005746.3		0.103985	0	11.6503	0
AC005747.1	Growth arrest-specific protein 7;GAS7	161.385	143.105	719.986	415.246
AC005753.2		0.311956	0	8.38819	0
AC005753.3		4.26339	0	40.0769	0
AC005772.2		0	0	0	42.6622
AC005774.2		5.71919	11.2777	0	0
AC005776.2		2.70362	8.99167	0	0
AC005785.1		2.8076	0	43.805	0
AC005785.2		3.43151	3.35283	41.7079	0
AC005786.2		0	0	9.78622	0
AC005787.1		1.14384	0	0	0
AC005790.1		0.935867	2.13362	0	0
AC005803.1		1.55978	0	0	0
AC005822.1		1.03985	0	0	0
AC005823.2		0	0.152401	0	0
AC005828.1		4.05542	0.609605	18.1744	25.5973
AC005828.2		0.311956	0	14.6793	0
AC005828.4		3.5355	0	9.0872	0
AC005828.5		0	0.304802	0	0
AC005828.6		1.55978	0.457204	0	0
AC005828.7		1.87173	0	23.0675	0
AC005829.1		0	3.81003	16.5434	0
AC005831.1		0.519926	0	0	0
AC005832.3		0	0	0.233005	0
AC005833.1		0	3.35283	0	0
AC005833.2		0.415941	6.24845	0	0
AC005837.1		2.39166	0.914407	0	0
AC005837.4		1.35181	0	0	0
AC005838.3		1.45579	2.28602	15.8444	0
AC005839.1		4.36738	10.2109	10.0192	0
AC005840.2		0	0	0	5.6883
AC005840.3		0	0	0	36.9739
AC005842.1		2.49565	0	0	0
AC005856.1		6.44708	0.304802	21.6695	0
AC005865.1		4.26339	0	11.8833	39.8181
AC005865.2		0	0	3.49508	0
AC005884.2		0	0.152401	0	0
AC005899.6		2.49565	0.304802	7.22316	2.84415
AC005899.7		0.20797	0	0	2.84415
AC005899.8		0.103985	0	3.96109	0
AC005899.9		6.55107	0	5.82513	8.53245
AC005906.2		1.87173	10.0585	100.891	91.0128
AC005906.3		0	0	0	2.84415
AC005908.3		56.36	101.194	133.745	159.272
AC005911.1		0	0	0.46601	0
AC005912.2		1.24782	0	0	0
AC005912.3		0	4.26723	0	0
AC005915.1		0.727896	0	0	0
AC005921.4		1.45579	0	1.16503	19.909
AC005962.1		1.14384	0	0	0
AC005962.2		1.03985	0	0	5.6883
AC005972.3		2.18369	5.79125	0.233005	14.2207
AC005998.1		1.55978	3.35283	0	0
AC005999.1		2.28767	5.79125	0	0
AC005999.2		3.11956	0	0	0
AC006001.2		4.26339	0.914407	0	0
AC006001.3		16.5336	34.8999	51.7272	42.6622
AC006003.1		4.47136	12.3445	0	39.8181
AC006007.1		0	0	0	17.0649
AC006008.1		2.8076	0	0	0
AC006017.1		2.49565	0	0	0
AC006017.2		0	0.304802	0	0
AC006019.1		35.043	56.2361	120.697	108.078
AC006019.2		14.142	13.7161	12.1163	36.9739
AC006019.3		1.66376	0	0	0
AC006026.1		0.831882	0	0	0
AC006026.3		0	3.81003	0	0
AC006028.1		0	4.41964	0	0
AC006030.1	Uncharacterized protein (Fragment);unassigned	0.935867	0	0	0
AC006040.1		0	0	0.233005	0
AC006041.1		1.35181	0	0	0
AC006041.2		1.97572	0	0	42.6622
AC006042.1		0	0	37.2808	0
AC006042.2		5.30325	13.7161	22.8345	0
AC006043.1		3.63948	0	0	0
AC006058.1		179.478	227.078	296.383	42.6622
AC006058.2		0	0	16.7764	0
AC006058.3		0.103985	3.50523	6.75715	0
AC006058.4		28.6999	47.3968	70.8336	0
AC006059.1		8.83874	9.29648	64.0764	42.6622
AC006059.5		0.415941	0	0	0
AC006063.1		2.28767	3.81003	0	0
AC006063.2		0	0	31.4557	0
AC006063.4		0	0	0	11.3766
AC006064.1		0.519926	0	0	0
AC006064.2		0	0.609605	0	0
AC006111.2		1.14384	3.04802	0	0
AC006111.3		0.519926	0	0	0
AC006112.1		21.7329	19.5074	75.0277	73.9479
AC006115.1		0.20797	0	0	0
AC006115.2		13.4141	21.1838	26.0966	39.8181
AC006116.10		1.97572	0	0	0
AC006116.2		0.935867	0	0	8.53245
AC006116.3		0	0	10.0192	0
AC006116.9		1.45579	0	0	0
AC006128.1		3.95144	2.59082	0	0
AC006130.3		2.18369	7.01046	0	0
AC006141.1		3.32753	0	0	0
AC006148.1		3.5355	6.24845	44.271	102.389
AC006148.2		2.49565	0	0	0
AC006150.1		0	2.13362	0	0
AC006160.1		1.55978	0	0	0
AC006197.2		1.66376	0	0	14.2207
AC006210.2		0.20797	0	0.233005	0
AC006213.1		2.59963	0	0	0
AC006213.2		4.99129	2.43842	0	36.9739
AC006213.3		2.8076	4.57204	0	0
AC006213.4		0	0	0.233005	0
AC006213.5		0.311956	0	0	0
AC006213.6		4.57535	5.48644	0	5.6883
AC006213.7		5.71919	0	0	0
AC006230.1		5.51122	11.2777	11.8833	5.6883
AC006237.1		0	0	17.7084	0
AC006249.1		2.28767	0	0	0
AC006254.1		8.63077	12.9541	18.1744	0
AC006254.2		0.103985	0	0	0
AC006254.3		0	0	21.4365	0
AC006262.1		0	0	13.7473	0
AC006262.2		0	0	6.99016	0
AC006270.1		3.22354	0	21.2035	0
AC006270.2		2.91159	3.35283	33.0867	0
AC006273.1		0.103985	0	0	0
AC006277.1		4.99129	6.24845	0	0
AC006296.2		1.45579	0	0	0
AC006296.3		0	3.96243	0	0
AC006299.1		0	5.48644	0	0
AC006305.4		1.24782	0	0	0
AC006330.1		3.32753	0.152401	0.233005	0
AC006333.1		3.01557	7.92486	0	0
AC006348.1		2.70362	0	0	0
AC006355.1		1.14384	0	0	0
AC006355.2		0.935867	0	0	0
AC006362.1		1.97572	5.33404	0	0
AC006364.1		0	0	0	39.8181
AC006372.2		0	0	10.9512	0
AC006372.3		3.74347	0	0	8.53245
AC006387.1		2.70362	0	0	0
AC006435.2		2.49565	0	0	0
AC006441.1		0	0	0.233005	0
AC006443.1		1.35181	1.06681	0	0
AC006449.1		2.28767	0.152401	0	0
AC006449.2		0	3.20043	0	11.3766
AC006449.3		0	1.06681	0	0
AC006450.3		0	0	0	28.4415
AC006452.2		1.35181	0	0	0
AC006453.3		0.103985	0	0	0
AC006459.1		0	0	0	28.4415
AC006460.2		7.27896	1.82881	16.5434	0
AC006461.1		0	6.24845	0	0
AC006480.3		1.97572	7.16286	0	0
AC006486.2		0	5.18164	0	0
AC006487.2		0.519926	0	0	0
AC006504.1		12.9982	8.68687	0	0
AC006504.2		1.03985	0	0	17.0649
AC006504.3		0.623911	8.53447	0	0
AC006504.4		0.935867	4.57204	0	0
AC006504.5		32.8593	59.4365	35.1838	0
AC006504.7		2.39166	0	0	0
AC006511.3		0.20797	0	0	0
AC006511.5		0	0	18.6404	0
AC006511.6		0.727896	0	0	0
AC006518.2		2.28767	0	0	0
AC006529.1		0	5.79125	0	0
AC006538.1		2.59963	10.9729	7.68917	0
AC006538.4		0	0	0	8.53245
AC006547.1		1.87173	7.62006	0	17.0649
AC006557.1		0.415941	0	0	0
AC006557.2		0	3.35283	0	0
AC006566.2		3.11956	0	0	0
AC006581.2		2.91159	3.81003	12.5823	0
AC006942.1		0	0	0	2.84415
AC006946.2		3.5355	15.8497	6.99016	0
AC006946.3		3.84745	3.81003	0	48.3505
AC006947.1		2.59963	4.57204	0	0
AC006960.2		0	2.59082	0	0
AC006960.4		1.76775	0	0	0
AC006963.2		1.76775	1.82881	0	0
AC006965.1		0.623911	0	0	0
AC006967.3		0	0	0	2.84415
AC006970.2		1.97572	0.457204	0	0
AC006971.1		0.103985	0	0	19.909
AC006978.1		11.9583	22.7078	0.233005	0
AC006978.2	Uncharacterized protein (Fragment);unassigned	2.0797	0	0	0
AC006994.1		1.35181	10.2109	0	0
AC006994.2		0	5.94365	0	0
AC007000.2		5.71919	10.3633	0	0
AC007000.3		3.63948	0	0	0
AC007000.4		2.59963	13.4113	0	0
AC007012.1		0.415941	0	0	0
AC007012.2		17.0536	15.0877	14.4463	22.7532
AC007016.1		3.11956	0	0	0
AC007036.2		1.55978	0	0	0
AC007036.5		0	4.87684	0	0
AC007038.1		0	1.21921	0	0
AC007040.2		0.103985	0	0	0
AC007041.1		0.623911	0.152401	0	0
AC007066.2		1.24782	0.152401	0	65.4154
AC007098.1		2.59963	7.92486	0.699016	0
AC007099.2		0.415941	0	0	0
AC007100.1		0.103985	0	0	0
AC007114.1		1.76775	0	32.6207	0
AC007114.2		5.09528	0	23.5335	45.5064
AC007128.1		0	0	0	8.53245
AC007132.1		0	0	0	17.0649
AC007151.1		1.14384	0	0	0
AC007161.1		0	0	0	17.0649
AC007161.2		1.87173	0	0	0
AC007191.1		1.87173	6.24845	0	0
AC007204.1		0.311956	0	0	0
AC007216.1		0	4.72444	0	0
AC007216.2		1.66376	0	9.0872	0
AC007216.3		4.26339	3.81003	0	0
AC007218.3		1.66376	0	15.1453	0
AC007220.2		1.87173	0	17.2424	0
AC007222.1		0.311956	0	0	0
AC007222.2		11.3344	6.24845	11.6503	68.2596
AC007223.1		4.05542	12.6493	18.6404	59.7271
AC007224.1		0	0	0	28.4415
AC007238.1		1.03985	0.152401	0	0
AC007256.1		5.92716	0	26.7956	0
AC007262.2		3.63948	21.4886	22.6015	28.4415
AC007272.2		0	0.152401	0.233005	0
AC007277.1		1.14384	0	0	0
AC007278.1		0	0	0	22.7532
AC007279.2		1.24782	0	0	0
AC007285.1		0	4.87684	10.4852	2.84415
AC007285.2		0	0	7.68917	0
AC007292.1		0.519926	5.02924	0	0
AC007292.2		3.43151	0	0	0
AC007298.1		2.0797	0	0	0
AC007318.1		2.28767	0.762006	0	0
AC007318.3		1.76775	0	0	8.53245
AC007325.1		0.20797	0.762006	0	2.84415
AC007325.4		4.15941	3.35283	0	0
AC007326.1		2.18369	4.72444	22.8345	0
AC007326.2		1.45579	0	0	0
AC007326.3		1.76775	0	0	0
AC007327.1		1.97572	5.63885	0	0
AC007327.2		0.623911	0	0	0
AC007342.1		0.623911	4.57204	0	0
AC007342.3		0	0	19.1064	0
AC007342.7		2.70362	11.5825	0	0
AC007347.1		0	2.43842	0	0
AC007349.1		0	0	0	11.3766
AC007349.3		1.24782	0	0	0
AC007362.1		0	0	7.45617	0
AC007365.1		0.727896	0	0	0
AC007365.2		1.66376	0	14.6793	0
AC007368.1		0	3.20043	0	0
AC007370.1		0	6.70565	0	0
AC007370.2		1.97572	0	0	0
AC007375.1		1.03985	0	0	0
AC007375.3		3.11956	4.72444	0	0
AC007381.1		0	0	0	2.84415
AC007383.2		0	0	2.09705	34.1298
AC007384.1		3.84745	3.04802	45.669	0
AC007386.1		0.935867	0	0	0
AC007387.3		0	0	0	19.909
AC007389.1		4.36738	1.82881	0	51.1947
AC007389.4		3.22354	0	0	0
AC007390.2		1.76775	0	31.6887	0
AC007402.1		1.24782	0	0.46601	17.0649
AC007402.2		1.03985	0	0	0
AC007405.2		8.52679	13.8685	21.2035	8.53245
AC007405.3		4.05542	0	3.96109	0
AC007405.4		5.09528	3.04802	0	0
AC007405.5		1.35181	0	0	0
AC007406.3		15.5978	18.7454	0	17.0649
AC007406.4		5.6152	9.90608	0	0
AC007406.5		9.35867	0	23.0675	42.6622
AC007431.1		6.03114	3.04802	0	0
AC007431.2		2.39166	2.13362	0	0
AC007431.3		5.40723	3.20043	0	0
AC007435.1		3.84745	0	0	0
AC007448.4		0.103985	0	0	0
AC007448.5		2.49565	0	15.8444	34.1298
AC007450.2		2.49565	0	0	0
AC007450.3		1.66376	0	0	0
AC007485.2		2.28767	0	47.9991	0
AC007493.1		0	0	0	31.2856
AC007494.1		1.55978	3.50523	0	0
AC007495.1		2.39166	2.13362	0	0
AC007496.2		0.415941	0	8.38819	36.9739
AC007496.3		5.82317	11.8873	0	0
AC007497.1		1.24782	0	0	0
AC007533.2		3.84745	0	20.2715	0
AC007535.1		0	8.99167	0	0
AC007537.1		0	0	0	22.7532
AC007541.1		0	3.65763	0	0
AC007546.3		1.76775	8.99167	30.2907	0
AC007552.2		0	0	37.7468	0
AC007557.1		1.76775	0	10.0192	0
AC007557.2		0	0	11.8833	0
AC007557.3		0.623911	5.48644	43.572	25.5973
AC007557.4		0	0	9.0872	0
AC007559.1		4.47136	7.01046	0	0
AC007560.1		0	0	0.233005	0
AC007563.1		0	1.82881	10.2522	0
AC007563.2		0	0	17.2424	0
AC007563.4		1.66376	0	0	5.6883
AC007566.1		9.77461	7.46766	55.2222	48.3505
AC007569.1		3.84745	0	16.0774	5.6883
AC007595.1		0.935867	0	0	0
AC007599.1		2.59963	0	0	0
AC007599.2		1.87173	0	0	0
AC007601.1		1.14384	0	10.2522	22.7532
AC007608.1		3.22354	0	0	0
AC007608.3		0.831882	0.152401	0	0
AC007610.3		1.35181	0	0	0
AC007610.6		5.82317	0	0	0
AC007611.1		2.49565	2.74322	0	31.2856
AC007613.1		1.24782	0	0	0
AC007614.1		2.18369	4.87684	28.6596	39.8181
AC007614.2		0	0	14.2133	8.53245
AC007618.1		0	1.52401	9.55321	0
AC007619.1		0.519926	0	0	0
AC007621.1		1.35181	0	0	0
AC007622.1		0	5.18164	0	0
AC007622.2		5.30325	0	0	0
AC007637.1		1.76775	0	0	0
AC007638.2		0	1.98122	0	28.4415
AC007639.1		0	4.72444	0	0
AC007656.3		0	1.52401	0	59.7271
AC007663.2		0	0.304802	0	0
AC007663.3		0.727896	0	0	0
AC007663.4		1.66376	0	0	0
AC007666.1		0	3.65763	7.92218	0
AC007666.2		2.91159	0	0	0
AC007671.1		0.831882	0	0	0
AC007679.3		0	4.26723	0	0
AC007681.1		59.2716	61.1129	0	0
AC007682.1		6.96701	4.11483	0	0
AC007683.1		0.623911	0.304802	0	0
AC007684.1		1.66376	0	0	0
AC007686.3		3.63948	7.16286	18.6404	51.1947
AC007686.4		0	0.152401	0	0
AC007687.1		4.57535	4.26723	0	0
AC007695.1		3.22354	6.70565	23.9995	88.1686
AC007728.1		2.18369	5.18164	19.5724	0
AC007728.2		1.03985	0	0	0
AC007731.2		9.25468	28.0418	0	0
AC007731.4		0	2.74322	10.9512	0
AC007736.1		0	0	17.4754	0
AC007743.1		5.09528	0	0.233005	17.0649
AC007749.2		0.727896	0	51.4942	8.53245
AC007751.1		3.43151	0.152401	0	0
AC007773.1		1.87173	5.79125	0	0
AC007780.1		1.66376	0	10.0192	0
AC007785.1		0	0	13.2813	0
AC007785.2		0	0	0	17.0649
AC007785.3		10.2945	0	64.3094	22.7532
AC007786.2		0.935867	0	0	19.909
AC007786.4		0	0	28.8926	22.7532
AC007787.2		0.519926	0.152401	0	0
AC007792.1		1.24782	0	0	0
AC007834.2		1.03985	0	0	0
AC007842.1		8.00686	3.04802	43.572	0
AC007849.2		0	0	0.233005	0
AC007861.1		1.35181	0	0	0
AC007878.1		12.5822	3.50523	19.8054	39.8181
AC007879.1		0	0	0.233005	0
AC007881.3		3.01557	0	0	0
AC007906.1		1.97572	0	25.6306	5.6883
AC007906.2	Uncharacterized protein;LOC105371267	1.76775	0.152401	0	0
AC007920.1		0.727896	0	0	0
AC007938.1		6.65505	0	0	0
AC007938.2		10.2945	3.50523	0	0
AC007938.3		387.553	275.999	0	42.6622
AC007952.4		1.45579	3.65763	0	0
AC007953.2		9.67062	7.31526	0	0
AC007954.1		6.96701	0	16.7764	0
AC007956.1		0	0	0.233005	0
AC007996.1		1.45579	3.20043	12.8153	99.5452
AC008013.2		2.70362	0.152401	0	0
AC008013.3		0	3.65763	0	0
AC008014.1		0.519926	7.46766	0.233005	0
AC008015.1		1.87173	0	0	0
AC008026.3		0.831882	0	0	0
AC008033.1		0.103985	0	0	0
AC008035.1		0.831882	0	0	0
AC008038.1		0.519926	0.457204	0.233005	0
AC008040.1		0	1.52401	0	19.909
AC008055.2		0	1.37161	0	5.6883
AC008056.1		6.75904	0	0	0
AC008056.2		2.39166	3.04802	0	34.1298
AC008056.3		7.07099	0	0	0
AC008060.5		0	0	0	68.2596
AC008066.1		0	0	17.9414	0
AC008067.1		1.66376	0	0	0
AC008073.1		1.66376	0	0	0
AC008073.2		3.43151	0	0	0
AC008073.3		0.935867	0	10.2522	0
AC008074.1		1.03985	5.94365	0	0
AC008079.1		18.7173	20.5742	243.49	62.5713
AC008080.4		0.727896	0	0	22.7532
AC008083.1		0	8.53447	0	0
AC008083.2		2.28767	0	0	28.4415
AC008083.3		2.70362	0	0	0
AC008088.2		0	0.457204	0	0
AC008105.1		0	7.16286	6.29114	0
AC008105.3		16.9496	17.3737	8.38819	8.53245
AC008114.1		0.935867	0	0	0
AC008115.2		1.76775	0	0	0
AC008115.3		1.87173	0	0	0
AC008115.4		0.727896	6.70565	0	31.2856
AC008119.1		3.74347	12.0397	0	0
AC008121.2		0	0	15.1453	0
AC008121.3		0	13.1065	0	0
AC008124.1		35.9789	57.1505	58.2513	31.2856
AC008126.1		2.8076	0	0	0
AC008128.1		0.103985	0.152401	0	0
AC008132.1		0	0.457204	0	0
AC008133.1		4.26339	4.72444	0	0
AC008134.1		0.623911	0	0	0
AC008147.2		0.831882	0	7.92218	0
AC008147.4		2.28767	3.35283	0	0
AC008149.1		1.45579	0	0	0
AC008149.2		2.0797	0	0	0
AC008164.1		0	0	0	14.2207
AC008264.2		0.727896	0	0	0
AC008267.1		0	0.152401	0	0
AC008267.3		1.45579	3.96243	0	0
AC008267.5		1.87173	3.81003	0	0
AC008268.1		0	0	0	17.0649
AC008269.1		22.0449	17.6785	76.6587	34.1298
AC008269.2		6.96701	0.609605	0	39.8181
AC008273.1		3.11956	0	0	0
AC008277.1		0.311956	0	8.8542	0
AC008278.1		0	0.152401	0	0
AC008280.3		0	5.02924	0	0
AC008393.1		3.01557	0	0	0
AC008393.2		0	2.43842	0	0
AC008397.1	Uncharacterized protein;LOC729966	0.831882	0	0	0
AC008403.2		0.831882	0	0	0
AC008415.1		0	0	0	22.7532
AC008417.1		2.59963	0	17.4754	0
AC008429.1		1.76775	0	0	17.0649
AC008429.2		0.311956	0.152401	0	0
AC008434.1		0.727896	3.35283	0	28.4415
AC008438.1		0	0	0	14.2207
AC008443.1		0	5.33404	0	31.2856
AC008443.7		1.14384	0	2.56306	0
AC008443.8		2.70362	0	0	0
AC008453.2		0	0	0	14.2207
AC008462.1		1.03985	0	0	0
AC008467.1		1.03985	0	0	0
AC008481.2		1.35181	0	0	0
AC008494.1		0	1.67641	0	0
AC008494.2		1.14384	0	0	0
AC008494.3		0	1.52401	0	0
AC008496.3		0	0	0	25.5973
AC008498.2		2.49565	10.0585	6.52415	0
AC008505.1		0.519926	0	0	5.6883
AC008507.1		2.0797	1.21921	0	22.7532
AC008507.2		3.11956	2.74322	0	0
AC008507.3		0	3.35283	0	0
AC008507.4		1.45579	0	0	0
AC008525.1		0.935867	0	0	0
AC008532.1		0.623911	0	0	0
AC008533.1		6.13513	3.96243	0	0
AC008534.1		0.623911	0	5.82513	0
AC008534.2		1.55978	0	0	0
AC008537.2		0	7.16286	0	25.5973
AC008537.3		1.97572	0	0	0
AC008543.1		1.35181	7.01046	0	0
AC008543.3		1.14384	0	0	8.53245
AC008543.4		0	1.21921	0.233005	0
AC008543.5		0	0	0	39.8181
AC008554.1		0	1.98122	0	0
AC008555.2		0	0	0	28.4415
AC008555.7		2.18369	0	0	28.4415
AC008562.1		0	0	0	36.9739
AC008567.1		0	0	18.4074	0
AC008568.1		0	0	14.6793	0
AC008569.2		2.0797	0	0.46601	0
AC008571.1		0	2.59082	0	0
AC008571.2		6.96701	2.74322	0	0
AC008574.1		0	0	14.4463	0
AC008588.1		0	0	0.233005	0
AC008591.1		0	0	0	42.6622
AC008601.1		1.55978	0	0	0
AC008610.1		2.70362	2.59082	0	0
AC008625.1		3.01557	0	10.4852	0
AC008627.1		2.18369	0	0	0
AC008629.1		0.935867	0	0	0
AC008632.1		1.03985	0	0	0
AC008635.2		0.727896	0	0	0
AC008659.1		0	0	0	11.3766
AC008663.1		0.519926	0	0	0
AC008663.2		0.727896	0	0	17.0649
AC008676.1		2.91159	0.152401	0	0
AC008676.3		2.18369	0	0	0
AC008677.1		0.103985	0	0	11.3766
AC008677.2		0	0	0.233005	0
AC008679.1		0	0	0	28.4415
AC008687.4	HCG1796489;LOC101059948	0.935867	0.304802	0	0
AC008691.1		0	0	61.7464	36.9739
AC008694.1		0	0	0	25.5973
AC008695.2		0	5.02924	6.99016	0
AC008696.1		0.103985	0	0	0
AC008705.2		0.831882	0	0	0
AC008708.1		0	4.11483	0	0
AC008708.2		4.47136	0	10.4852	0
AC008728.1		0	5.02924	0	0
AC008731.1		1.87173	3.50523	0	0
AC008736.1		1.24782	0	0	0
AC008737.1		0.935867	1.82881	0	0
AC008738.1		0	0	16.0774	0
AC008738.4		1.14384	0	0	0
AC008739.5		2.18369	0	0	0
AC008740.1		0	0	0	8.53245
AC008740.2		1.76775	0	0	0
AC008743.1		0.20797	0	12.1163	0
AC008750.3		0.311956	1.37161	0	0
AC008750.5		0	2.28602	0	0
AC008751.1		1.14384	0	0	0
AC008751.3		0	0	12.8153	0
AC008752.1		0.727896	0	0	0
AC008752.2		0.20797	0	0	0
AC008752.3		0.519926	0	0	0
AC008752.4		3.01557	2.89562	0	0
AC008758.2		0	0	0	31.2856
AC008760.2		1.03985	0	0	0
AC008761.2		1.03985	5.79125	24.2325	19.909
AC008761.3		5.09528	0	0	0
AC008764.10		4.8873	0	12.5823	0
AC008764.2		0.519926	0	0	0
AC008764.6		1.14384	0	0	0
AC008764.8		2.70362	5.18164	32.6207	0
AC008770.3		0	0	22.1355	2.84415
AC008771.1		5.82317	5.02924	0	14.2207
AC008782.1		0	0	0	5.6883
AC008798.3		0.935867	0	0	0
AC008802.1		0	4.11483	0	0
AC008805.1		1.14384	0	0	0
AC008808.1		0	2.59082	0	0
AC008813.1		0	0.152401	0	0
AC008817.1		0.415941	0	0	0
AC008825.1		0	0	0	8.53245
AC008833.1		2.18369	1.37161	11.4173	39.8181
AC008850.2		0	0.152401	0	0
AC008852.1		1.35181	5.94365	0	0
AC008870.3		1.24782	2.89562	0	0
AC008870.5		0	5.48644	0	0
AC008875.3		2.0797	0	0	17.0649
AC008883.2		0.415941	0	0	0
AC008883.3		0	6.70565	0	36.9739
AC008894.2		0	1.37161	0	14.2207
AC008895.1		1.45579	14.0209	0	0
AC008897.2		0.935867	0	0	0
AC008897.3		0.103985	0.152401	0	0
AC008906.1		0	4.41964	0	28.4415
AC008906.2		0	6.55325	0	0
AC008937.3		3.11956	0	19.5724	0
AC008940.1		0	0	14.2133	0
AC008953.1		2.18369	0	0	25.5973
AC008957.1		0.935867	5.94365	0	0
AC008957.2		0.935867	0	3.02907	0
AC008957.3		4.05542	18.2881	0	0
AC008958.1		0.519926	0	0	0
AC008966.1		5.09528	7.46766	0	28.4415
AC008969.1		17.0536	42.8248	60.3484	42.6622
AC008969.2		0.20797	0	10.7182	36.9739
AC008982.2		1.97572	1.06681	0	0
AC008985.1		1.97572	3.96243	0	31.2856
AC008992.1		2.18369	7.16286	0	0
AC009019.1		2.28767	0	0	22.7532
AC009021.1		0	1.67641	0	0
AC009021.2		1.03985	0	0	0
AC009022.1		11.4384	5.79125	12.8153	0
AC009022.2		1.35181	3.35283	0	0
AC009027.1		0	2.89562	0	0
AC009032.1		0	0	0.932021	0
AC009044.1		1.45579	0.304802	0	0
AC009053.2		11.3344	13.7161	83.4159	0
AC009053.3		1.14384	0	0	0
AC009053.4		0	28.499	0	0
AC009054.2		0	0	0	28.4415
AC009060.1		0.311956	0	0	0
AC009061.2		3.32753	7.46766	25.1646	2.84415
AC009063.2		7.79889	3.81003	34.9508	5.6883
AC009063.3		2.70362	0	0	0
AC009065.3		1.76775	4.26723	0	5.6883
AC009065.4		1.66376	0	0	0
AC009065.5		1.76775	0	0	0
AC009065.6		2.70362	7.16286	0	0
AC009065.7		0.311956	0	0	2.84415
AC009065.9		0.311956	5.79125	8.15518	0
AC009078.3		13.726	12.0397	24.9316	5.6883
AC009081.2		0	5.18164	0	0
AC009084.2		10.5025	23.165	33.5528	19.909
AC009086.2		0.727896	0	0	17.0649
AC009088.1		1.24782	0	0	0
AC009088.4		0	0.152401	0	0
AC009090.1		1.14384	0	7.92218	0
AC009090.3		1.55978	0	0	34.1298
AC009090.4		1.55978	0	0	42.6622
AC009090.6		7.38295	1.37161	0	42.6622
AC009093.1		3.01557	1.67641	9.78622	0
AC009093.10		0	4.26723	0	0
AC009093.2		0	1.21921	10.4852	0
AC009097.1		0	0	0	17.0649
AC009097.2		0	0	0	17.0649
AC009097.4		1.76775	0	0	0
AC009102.1		11.0224	12.3445	16.7764	82.4803
AC009102.2		4.47136	13.1065	13.5143	0
AC009102.3		1.76775	19.2026	56.6203	11.3766
AC009102.4		4.05542	5.33404	7.92218	0
AC009107.2		3.32753	0	0	0
AC009108.3		0	2.59082	0.699016	0
AC009110.1		0	9.14407	0	0
AC009113.1		4.47136	6.70565	23.0675	0
AC009118.1		0.311956	0	0	0
AC009118.3		1.97572	0	0	0
AC009119.1		1.35181	0	0	0
AC009120.1		2.18369	10.3633	5.35912	25.5973
AC009120.2		10.2945	14.7829	20.7375	19.909
AC009120.3		5.30325	5.18164	16.7764	0
AC009120.5		0	0	9.0872	0
AC009126.1		10.0866	1.67641	14.6793	0
AC009133.1		0	0	0	42.6622
AC009135.1		2.59963	0	0	45.5064
AC009135.2		2.49565	1.37161	0	14.2207
AC009137.2		2.49565	0	0	0
AC009139.1		0	0	0	19.909
AC009145.2		0	3.04802	0	0
AC009145.3		0	0	11.8833	0
AC009148.1		8.31882	6.40085	19.3394	8.53245
AC009152.3		3.95144	2.28602	0	0
AC009152.6		0	3.35283	0	0
AC009154.2		0.727896	0	0	0
AC009163.4		0.311956	0	0	0
AC009163.7		1.45579	0	0	0
AC009166.2		2.28767	0	0	22.7532
AC009220.2		2.49565	0	0	0
AC009227.1		11.9583	3.96243	8.62119	0
AC009228.1		2.70362	9.44888	26.3296	0
AC009234.1		6.3431	9.75368	0	0
AC009237.14		0	0	0	31.2856
AC009237.15		0.935867	0	0	0
AC009237.3		14.35	19.355	31.4557	14.2207
AC009237.8		1.66376	9.90608	22.3685	0
AC009242.1		9.77461	12.0397	0	0
AC009244.2		4.47136	0	0	0
AC009245.1		2.28767	0	1.39803	0
AC009264.1		30.0517	17.9833	0	0
AC009268.1		3.5355	0	0	0
AC009268.2		0	0.152401	0	0
AC009268.3		1.24782	0	0	0
AC009269.4		1.45579	0	0	0
AC009271.1		0	0	0	5.6883
AC009275.1		2.49565	0	10.7182	0
AC009283.1		0	3.35283	18.1744	59.7271
AC009299.2		0.20797	0.152401	0	0
AC009299.3		0	11.1253	0	0
AC009303.2		0	10.3633	0	0
AC009303.4		0.103985	0	0	0
AC009315.1		0.103985	3.81003	0	0
AC009318.1		14.7659	11.5825	9.55321	45.5064
AC009318.2		5.40723	13.8685	21.9025	0
AC009318.3		2.49565	9.44888	0	0
AC009320.1		1.55978	7.92486	0	0
AC009365.4		0.623911	0.457204	0	0
AC009396.1		1.55978	0	0	0
AC009396.2		1.55978	5.79125	0	0
AC009396.3		0.623911	0	0	0
AC009403.1		1.03985	0	0	2.84415
AC009403.2		2.18369	3.65763	0	5.6883
AC009404.1		1.35181	1.06681	0	0
AC009411.1		2.59963	0	0	0
AC009413.3		0	1.21921	0	0
AC009432.2		2.59963	0	0	0
AC009435.1		0	0.152401	0	0
AC009480.1		1.55978	0	0	0
AC009487.2		0.311956	0	0	0
AC009487.4		1.03985	0	0	0
AC009501.1		1.55978	0	0	0
AC009502.1		0.831882	0	0	0
AC009506.2		1.87173	0	5.82513	0
AC009533.1		0	8.99167	0	0
AC009533.2		0	0	0	2.84415
AC009533.4		0	5.48644	0	0
AC009542.1		1.35181	0	0	25.5973
AC009549.1		11.0224	13.5637	17.9414	0
AC009554.1		5.82317	0	0	0
AC009554.2		1.35181	2.28602	10.0192	0
AC009560.1		0	0	22.1355	0
AC009560.3		1.03985	2.89562	0	0
AC009560.4		2.18369	0	0	0
AC009563.1		2.28767	0	0	0
AC009570.2		1.35181	0	0	0
AC009623.1		1.45579	0	0	8.53245
AC009630.4		0	0	8.38819	0
AC009634.1		0	6.09605	0	0
AC009682.1		2.70362	0	10.9512	0
AC009690.1		0.831882	0	9.78622	0
AC009690.2		3.01557	0	13.9803	2.84415
AC009704.3		0	3.20043	0	0
AC009716.2		2.0797	0	24.9316	0
AC009754.1		4.47136	0	0	0
AC009774.1		1.24782	0	0	0
AC009779.3		6.86302	0	0	2.84415
AC009779.5		0.103985	0	0	0
AC009804.2		0.831882	0	0	0
AC009812.1		1.87173	0	25.6306	0
AC009812.3		2.91159	0	0	0
AC009812.4		5.19926	0	0	0
AC009831.1		0	0.152401	0	0
AC009879.1		0.103985	0	22.3685	0
AC009879.4		0.415941	0	0	0
AC009884.1		0	0	0	56.883
AC009898.1		0.831882	0	0	0
AC009899.1		11.1264	6.85806	6.99016	56.883
AC009901.1		0	5.18164	0	0
AC009901.2		1.14384	0	0	0
AC009902.2		0.415941	0	0	0
AC009902.3		2.59963	0	0	0
AC009908.1		1.35181	0	0	0
AC009927.1		1.55978	10.2109	0	0
AC009948.1		0.519926	0	0	0
AC009948.2		2.59963	0	0	0
AC009948.4		5.09528	0	32.8537	0
AC009950.1		0.623911	0	14.4463	0
AC009951.4		6.03114	0	0	0
AC009951.5		1.45579	0	0	0
AC009951.6		0.519926	0	0	0
AC009955.1		0.415941	0	0	0
AC009961.1		4.67933	2.74322	0	14.2207
AC009961.4		0	0	0	11.3766
AC009967.2		0.831882	0	0	0
AC009974.1		0.831882	0	0	0
AC009974.2		0.103985	3.96243	20.9705	0
AC009975.1		1.03985	0	0	0
AC009975.2		0	6.85806	0	0
AC009987.1		0.831882	0	0	0
AC009996.1		2.18369	4.87684	0	0
AC010086.3		47.9372	117.197	0	0
AC010099.3		0	0	0	19.909
AC010132.4		4.57535	4.87684	19.8054	0
AC010136.1		0.623911	6.09605	0	0
AC010157.1		4.15941	0	0	0
AC010157.2		6.03114	6.70565	17.9414	0
AC010163.1		0	1.82881	0	0
AC010163.2		0.727896	0	0	0
AC010163.3		1.97572	5.94365	0	0
AC010168.1		0	3.04802	10.0192	0
AC010168.2		14.8699	0	34.0188	17.0649
AC010173.1		5.40723	0	0	0
AC010175.1		1.14384	0	0	0
AC010181.1		2.28767	0	0	0
AC010181.2		1.24782	0	0	0
AC010182.1		0	0	0	65.4154
AC010184.1		0.935867	0	0	0
AC010186.2		0	3.20043	0	0
AC010186.3		3.84745	0	11.8833	2.84415
AC010197.2		1.14384	7.46766	0	0
AC010198.1		0	0	20.7375	0
AC010198.2		21.213	30.1754	101.59	108.078
AC010201.2		0	11.7349	0	0
AC010201.3		2.39166	0	0	14.2207
AC010203.1		0	1.52401	0	0
AC010203.2		1.55978	0	0	0
AC010205.1		2.59963	0	0	0
AC010210.1		25.0604	30.023	10.2522	0
AC010226.1		2.59963	4.11483	0	0
AC010240.1		2.8076	0	0	0
AC010240.2		0.103985	0	0	0
AC010240.3		0	6.70565	0	0
AC010240.4		0	4.72444	4.4271	0
AC010245.2		3.11956	0	13.2813	0
AC010247.1		1.97572	0	0	0
AC010247.2		0.103985	0	0	0
AC010255.3	Uncharacterized protein;LOC100505841	1.45579	0	0	0
AC010261.1		0	0.152401	0	0
AC010266.2		0	0	0	51.1947
AC010271.2		0.415941	0	0	0
AC010271.3		0	0.152401	0	0
AC010275.1		4.67933	7.46766	8.38819	0
AC010280.1		0.831882	7.01046	0	17.0649
AC010280.2		0	0	8.15518	0
AC010280.3		0	0	0	54.0388
AC010285.1		1.14384	4.11483	10.0192	5.6883
AC010285.3		2.39166	6.24845	18.6404	0
AC010287.1		1.55978	0	0	0
AC010292.1		0	1.98122	0	0
AC010297.1		0	0	0	8.53245
AC010300.1		13.934	15.5449	0	5.6883
AC010306.1		0	0.304802	0	0
AC010307.2		0	0.609605	0	14.2207
AC010307.3		2.0797	0	0	14.2207
AC010319.3		0	5.33404	0	0
AC010320.2		1.35181	0	0	0
AC010320.4		1.55978	0	0	0
AC010320.5		0	0	18.4074	0
AC010326.1	Zinc finger protein 256;ZNF256	7.27896	10.5157	0	0
AC010326.4		0.935867	3.20043	0	0
AC010326.5		6.75904	0	0	2.84415
AC010327.3		0	2.43842	0	0
AC010327.4		1.87173	3.96243	0	0
AC010327.5		1.97572	7.92486	0	0
AC010327.6		4.47136	2.43842	6.29114	0
AC010327.7		1.03985	0	0	0
AC010327.8		0.623911	0.152401	0	0
AC010328.1		1.66376	9.44888	0	0
AC010328.2		0.935867	0	0	0
AC010331.1		0.415941	0	5.12612	0
AC010332.1		0	13.5637	0	0
AC010332.2		1.35181	0	0	0
AC010332.3		0	0.152401	13.5143	11.3766
AC010333.1		1.03985	0	0	22.7532
AC010336.1		1.55978	0	0	0
AC010336.5		0.311956	0	0	0
AC010336.8		2.18369	10.0585	0	0
AC010342.1		0.103985	0	0	48.3505
AC010359.1		2.8076	0	0	0
AC010359.2		0	2.28602	7.68917	2.84415
AC010359.3		9.1507	12.4969	11.1843	25.5973
AC010368.1		0	0	0	11.3766
AC010378.2		0.727896	0	0	0
AC010385.1		0	0.152401	0	0
AC010401.1		1.03985	0.914407	0	0
AC010409.1		0	0	0	36.9739
AC010422.2		0.519926	0	0	0
AC010422.4		0	0	7.45617	0
AC010422.8		1.87173	2.43842	0	0
AC010424.1		40.4502	12.0397	0	0
AC010442.1		0	2.89562	0	0
AC010460.1		0	0	0	19.909
AC010463.3		2.49565	0	10.0192	0
AC010468.2		3.22354	5.63885	0	0
AC010469.1		0	2.28602	6.99016	0
AC010476.1		1.24782	0	0	0
AC010476.2		4.15941	0	0	45.5064
AC010478.1		47.1053	37.3383	18.8734	0
AC010491.1		4.67933	0	0	17.0649
AC010491.2		4.15941	16.1545	0	19.909
AC010501.2		4.15941	0	0	0
AC010503.5		0	0	0.233005	0
AC010504.1		0.727896	0	9.55321	0
AC010511.1		0	0	0	14.2207
AC010524.1		0	0	0	22.7532
AC010525.1		0.519926	0	0	0
AC010531.4		0	0	0	17.0649
AC010531.5		0	4.26723	0	0
AC010533.1		1.03985	0	6.52415	0
AC010536.1		0.727896	9.29648	2.09705	76.792
AC010536.2		0.727896	0	0	0
AC010536.3		1.03985	0	16.3104	0
AC010538.1		3.95144	2.89562	17.2424	0
AC010542.6		0.311956	0	0	0
AC010546.1		0	4.11483	0	0
AC010595.1		0	0	0.46601	0
AC010601.1		0	4.11483	0	0
AC010601.2		0	0	0	5.6883
AC010605.1		0	0	17.4754	0
AC010608.3		1.76775	0	0	0
AC010615.1		0	2.89562	10.2522	48.3505
AC010615.2		30.9876	41.1483	0	59.7271
AC010618.2		0	0	13.5143	0
AC010618.3		3.63948	3.81003	14.2133	14.2207
AC010620.1		0.103985	0	0	0
AC010623.1		2.0797	9.29648	22.1355	0
AC010624.1		0	0	0	19.909
AC010624.2		5.82317	3.96243	0	0
AC010624.3		0.519926	0	0	17.0649
AC010624.5		2.49565	0	0	0
AC010627.1		0.415941	0	0	0
AC010632.2		2.59963	0	0	0
AC010636.1		1.14384	0	17.9414	45.5064
AC010638.1		3.43151	0	0	0
AC010641.2		2.70362	0	0	0
AC010642.2		4.57535	0	0	0
AC010649.1		0	2.43842	0	0
AC010653.1		1.03985	1.06681	0	0
AC010654.1		0	0	7.92218	0
AC010677.1		0	0.152401	0	0
AC010680.1		0.415941	0.152401	16.3104	0
AC010680.2		3.95144	0	0	0
AC010680.5		2.49565	3.20043	0	0
AC010729.1		0.831882	0	0	0
AC010731.3		1.55978	0	0	0
AC010733.1		0.935867	0	0	0
AC010735.2		1.24782	0	0	0
AC010740.1		1.24782	0	0	0
AC010754.1		1.35181	0	0	0
AC010761.1		1.24782	18.7454	0	0
AC010761.3		3.22354	0	13.0483	0
AC010809.1		1.87173	0	10.4852	0
AC010809.2		4.15941	0	0	0
AC010834.3		6.03114	4.72444	0	28.4415
AC010857.1		11.4384	15.0877	0	0
AC010867.1		0	0.152401	0	0
AC010878.1		0.311956	1.06681	0	22.7532
AC010884.1		0.415941	0	0	0
AC010886.1		0	5.94365	0	0
AC010889.1		0.415941	2.13362	0	0
AC010889.2		5.09528	0	0	0
AC010896.1		1.14384	0	0	0
AC010900.1		1.55978	0	0	0
AC010913.1		0	0.152401	0	0
AC010928.2		4.67933	3.20043	0	0
AC010928.3		2.91159	0	0	0
AC010931.1		0	3.65763	9.0872	0
AC010941.1		5.6152	10.8205	0	17.0649
AC010969.2		0.20797	4.87684	20.7375	0
AC010969.3		1.76775	0	0	0
AC010970.1		0.519926	0.609605	0.233005	0
AC010973.2		0.935867	0	0	0
AC010974.2		2.28767	0	0	0
AC010975.1		0.727896	0	0	0
AC010976.1		5.51122	3.65763	10.4852	79.6362
AC010978.1		0	5.48644	0	0
AC010980.2		8.52679	10.8205	0	0
AC010996.1		0	0.762006	0	0
AC010997.4		0	0	10.2522	39.8181
AC010998.2		0	1.37161	1.63104	0
AC011005.1	Uncharacterized protein;unassigned	0.20797	0.304802	0	0
AC011005.2		0.727896	0	0	0
AC011008.1		0.623911	3.35283	0	0
AC011008.2		19.5492	12.8017	35.4168	31.2856
AC011043.1		1.55978	0	23.7665	0
AC011092.2		0	4.87684	26.0966	0
AC011092.3		0.103985	0	22.8345	0
AC011155.1		0	0	13.9803	0
AC011196.1		4.26339	0	0	0
AC011228.1		6.3431	0	0	0
AC011233.2		0	0	0	8.53245
AC011239.1		3.22354	5.79125	0	0
AC011239.2		3.74347	5.63885	0	11.3766
AC011243.1		2.28767	0	0	0
AC011247.1		0	0	6.05814	0
AC011247.2		0	0	0	8.53245
AC011270.2		6.96701	0	0	0
AC011287.1		0	6.09605	2.33005	36.9739
AC011287.2		0	4.26723	0	0
AC011290.2		0	0	0	8.53245
AC011297.1		0	6.24845	8.38819	0
AC011306.1		0	2.28602	0	0
AC011317.1		1.03985	0	0	0
AC011322.1		0.935867	0.152401	0	0
AC011337.1		1.55978	0	0	0
AC011342.1		0	0	0	22.7532
AC011346.1		8.00686	12.1921	0	0
AC011352.1		0	0	0	8.53245
AC011365.2		0	0	0.233005	11.3766
AC011369.1		3.43151	7.01046	0	0
AC011369.2		1.14384	4.11483	28.8926	8.53245
AC011370.1		8.94273	6.70565	0	0
AC011373.1		1.24782	0	0	0
AC011374.1		0.415941	0	0	0
AC011379.1		2.59963	0	0.233005	0
AC011379.2		5.09528	3.20043	0	0
AC011388.1		0	0	0	17.0649
AC011389.2		0	3.96243	0	28.4415
AC011389.3		0	0	19.5724	0
AC011405.1		9.56664	6.70565	8.8542	0
AC011406.1		0.831882	0	0	0
AC011416.1		1.03985	0	0	0
AC011416.3		0	5.79125	0	0
AC011416.4		50.6408	30.7851	0	0
AC011442.1		0.831882	0	16.3104	0
AC011445.1		0.935867	2.28602	0	0
AC011447.3		3.22354	0	0.233005	0
AC011447.6		2.28767	0	0	0
AC011447.7		0	0	0	8.53245
AC011448.1		0.519926	0.609605	0	0
AC011450.1		0	5.48644	0	0
AC011451.2		1.87173	0	0	0
AC011451.3		0.103985	0	14.2133	0
AC011451.4		2.70362	5.02924	0	0
AC011452.3		0.103985	0.152401	0	0
AC011453.1		0	0	0	48.3505
AC011455.2	Uncharacterized protein (Fragment);unassigned	1.45579	0	0	0
AC011455.6		0	3.50523	0.233005	0
AC011458.1		0.831882	7.77246	10.0192	0
AC011460.1		0	0	0	113.766
AC011462.3		0	0.152401	0	0
AC011462.5		1.14384	4.87684	0	0
AC011465.1		0	5.18164	0	0
AC011466.1		0	0.152401	0	0
AC011467.1		0	0.152401	0	14.2207
AC011467.5		0	2.28602	0	0
AC011467.6		0	0	0	8.53245
AC011468.1		1.45579	0	0	0
AC011468.4		0.103985	0	0	0
AC011468.5		0	3.50523	0	0
AC011472.1		0	0	0	22.7532
AC011472.5		0	0	0.233005	0
AC011474.1		3.5355	2.28602	16.3104	31.2856
AC011474.2		0	0	19.5724	0
AC011474.4		0	2.89562	49.6301	59.7271
AC011476.3		0.935867	0	0	0
AC011477.1		2.8076	0	6.29114	0
AC011477.2		1.24782	0	9.78622	0
AC011477.5		1.87173	0	0	0
AC011477.6		1.24782	0	0	0
AC011477.7		2.39166	0	0	0
AC011478.1		1.03985	0	0	0
AC011479.3		0.519926	0	0	0
AC011479.4		3.43151	1.37161	0	11.3766
AC011481.3		0	2.43842	0.233005	0
AC011487.1		0.727896	0	0	0
AC011487.2		0	0	0	17.0649
AC011491.2		0.103985	0	0	0
AC011498.1		4.36738	0	0	0
AC011498.3		1.24782	0	0	0
AC011498.6		1.14384	0	0	0
AC011498.7		2.8076	8.99167	0	0
AC011504.1		2.91159	5.02924	0	0
AC011505.1		0	0	0	28.4415
AC011507.1		1.45579	0	0	39.8181
AC011525.1		0	0	0	22.7532
AC011595.1		1.66376	5.33404	0	0
AC011595.2		3.74347	16.0021	0	0
AC011602.1		0	5.33404	0	0
AC011603.3		2.39166	5.02924	0	0
AC011625.1		0	0	13.2813	0
AC011632.1		2.28767	0	0	0
AC011676.1		2.18369	0	0	0
AC011676.5		4.78332	0	0	0
AC011700.1		0.727896	0	26.5626	0
AC011726.1		0.727896	1.98122	0	0
AC011747.1		0	0	0	2.84415
AC011754.2		0	0.914407	0	0
AC011755.1		0.727896	0	0	17.0649
AC011767.1		2.28767	0	0	0
AC011773.1		1.45579	0	0	0
AC011773.4		0.519926	0	0	0
AC011815.1		9.77461	5.94365	0	34.1298
AC011815.2		4.57535	0	23.9995	0
AC011815.3		0.415941	10.3633	18.1744	0
AC011816.1		1.97572	0	0	0
AC011824.1		14.35	5.94365	18.1744	17.0649
AC011824.2		16.4297	9.75368	0	0
AC011824.3		0.727896	7.31526	0	0
AC011824.4		6.3431	0	0	0
AC011825.2		1.66376	0	0	0
AC011840.3		0	0	17.7084	0
AC011899.1		22.2528	39.4719	89.94	0
AC011899.2		6.23911	15.5449	36.5818	5.6883
AC011899.3		3.22354	10.0585	7.92218	0
AC011899.4		9.35867	10.6681	0	0
AC011912.1		2.49565	0.914407	19.5724	2.84415
AC011933.2		1.35181	4.87684	0	11.3766
AC011939.1		2.0797	10.5157	64.3094	0
AC011939.2		2.18369	3.96243	0	0
AC011944.2		3.5355	0	0	0
AC011978.1		0.103985	0	0	0
AC011978.2		3.32753	5.18164	0	0
AC011995.1		3.01557	2.89562	11.4173	28.4415
AC011995.2		63.9509	75.591	53.3582	51.1947
AC011999.1		0.103985	0	0	0
AC012020.1		13.83	16.7641	38.6789	39.8181
AC012060.1		1.24782	0	0	0
AC012063.1		3.43151	0	0	0
AC012065.2		1.55978	0	0	0
AC012066.1		1.14384	9.60128	0	0
AC012066.2		0	0	25.6306	0
AC012073.1		1.14384	0	26.0966	0
AC012076.2		8.63077	0	22.3685	0
AC012085.2		2.91159	7.77246	0	22.7532
AC012103.1		1.14384	0	0	0
AC012146.1		1.66376	0	0	0
AC012150.1		0	7.01046	0	0
AC012157.2		1.87173	0	0	0
AC012157.3		0	0	0	5.6883
AC012158.1		1.87173	0	0	0
AC012174.1		1.55978	8.07727	0	0
AC012178.1		1.03985	0.152401	0	0
AC012181.2		0	0	0	45.5064
AC012184.3		0	4.11483	0	0
AC012186.1		0	0	22.3685	0
AC012186.3		0	2.43842	13.0483	0
AC012213.1		1.14384	11.2777	17.7084	0
AC012213.2		0	3.96243	0	0
AC012213.4		0.831882	0	0	0
AC012236.1		0.623911	0	10.0192	0
AC012254.3		1.14384	0	0.932021	0
AC012254.5		1.76775	0	0	0
AC012291.2		1.14384	0	0	0
AC012291.3		0.103985	2.74322	0	0
AC012301.1		2.0797	0	0	0
AC012301.2		2.59963	0	0	5.6883
AC012306.4		1.03985	0	0	0
AC012309.2		1.55978	0	0	0
AC012313.1		9.1507	7.62006	11.4173	2.84415
AC012313.3		0.103985	0	0	0
AC012313.4		1.03985	5.63885	7.22316	0
AC012313.5		3.63948	1.67641	0	42.6622
AC012313.6		2.70362	0	0	0
AC012313.8		4.05542	0.914407	0	31.2856
AC012313.9		1.14384	0.304802	15.1453	0
AC012317.2		0.415941	0	0	0
AC012322.1		1.66376	0	0	0
AC012349.1		2.0797	0	0	0
AC012354.1		0	0	11.1843	25.5973
AC012354.5		0	0	0	2.84415
AC012358.1		0	3.96243	0	0
AC012358.3		1.66376	0	10.4852	0
AC012358.4		3.32753	7.92486	17.4754	0
AC012360.3		4.8873	5.94365	23.7665	0
AC012368.1		2.70362	2.43842	15.6114	0
AC012378.2		1.76775	4.87684	0	0
AC012404.1		1.24782	0	0	0
AC012404.2		0	12.9541	30.7567	0
AC012414.4		2.28767	0	0	0
AC012433.2		5.82317	11.8873	0	0
AC012442.2		0.727896	0	0	0
AC012443.2		5.51122	19.355	0	0
AC012447.1		0	0	0.233005	0
AC012456.2		0.311956	0	0	0
AC012459.1		9.67062	16.1545	0	0
AC012464.3		1.45579	5.63885	0	31.2856
AC012467.1		0.311956	8.68687	0	0
AC012467.2		12.9982	12.0397	17.2424	2.84415
AC012486.1		0.103985	0	0.233005	0
AC012500.1		2.0797	0	12.3493	0
AC012501.2		1.97572	0	0	0
AC012508.1		3.32753	0	21.4365	0
AC012508.2		1.35181	0	0	0
AC012508.3		3.32753	0	0	0
AC012511.1		1.45579	0	0	0
AC012512.1		0	4.41964	0	0
AC012513.1		1.35181	3.20043	0	11.3766
AC012513.2		0	4.41964	0	0
AC012513.3		56.048	40.0815	20.5045	25.5973
AC012519.1		4.67933	6.70565	0	0
AC012533.1		0.519926	0	0.233005	0
AC012535.1		3.01557	0	0	0
AC012557.1		1.35181	0	0	0
AC012557.2		0	7.16286	0	0
AC012568.1		0.935867	0	0	28.4415
AC012569.1		0	4.41964	0	0
AC012593.1		0	0	15.6114	0
AC012613.2		10.2945	28.9562	0	0
AC012615.1		1.14384	0	0	8.53245
AC012615.4		0	0	0	17.0649
AC012615.6		2.49565	4.26723	22.1355	45.5064
AC012618.1		0.831882	0	0	0
AC012618.2		0.519926	0	0	0
AC012618.3		4.15941	7.31526	0	0
AC012629.3		0	0	0	22.7532
AC012636.1		0	3.35283	0	0
AC012640.4		1.24782	8.22967	0	0
AC012640.6		0	0	0	11.3766
AC012645.1		1.45579	0	0	0
AC012645.2		0.311956	0	0	0
AC012645.3		0.519926	0	0	0
AC012645.4		0	0	0	14.2207
AC012651.1	Uncharacterized protein (Fragment);unassigned	1.55978	0	0	0
AC012668.2		0.831882	0	0	0
AC012676.3		2.28767	0	0	0
AC012676.5		7.48694	1.52401	0	8.53245
AC013267.4		0.103985	0	0	0
AC013286.1		0	0	0	14.2207
AC013287.1		0.935867	0	0	0
AC013290.1		1.45579	0	0	0
AC013355.1		1.66376	0	0	0
AC013391.3		1.55978	0	0	0
AC013394.1	Uncharacterized protein (Fragment);unassigned	5.09528	26.5178	0	28.4415
AC013400.1		1.87173	0	0	0
AC013402.1		0	0	0	17.0649
AC013404.1		0	0	0	14.2207
AC013410.2		0	0	0	11.3766
AC013429.2		0.623911	7.62006	0	0
AC013452.2		0.623911	1.52401	0	0
AC013452.3		0.103985	3.35283	0	0
AC013460.1		1.24782	4.87684	38.6789	0
AC013467.3		2.91159	0	0	0
AC013468.1		1.45579	3.65763	0	0
AC013470.2	Uncharacterized protein;LOC102725191	1.35181	0	0	0
AC013472.1		1.03985	2.28602	0	0
AC013486.1		0	1.82881	0	14.2207
AC013509.1		0.935867	0	0	0
AC013553.1		0.415941	0	0	0
AC013562.1		1.55978	1.67641	0	39.8181
AC013562.2		1.45579	0	5.35912	0
AC013640.1		1.66376	0	0	0
AC013643.2		0.519926	12.8017	0	19.909
AC013643.3		0.935867	0	0	11.3766
AC013652.1		1.87173	0	0	11.3766
AC013701.1		0	0	0	2.84415
AC013716.1		11.5424	17.8309	21.2035	0
AC013726.1		1.87173	0	0	0
AC013726.2		0	1.67641	0	0
AC013731.1		3.84745	3.50523	0	0
AC013828.1		0	0	27.0286	0
AC015540.1		10.0866	5.79125	0	14.2207
AC015563.1		1.76775	0	0	0
AC015656.1		0.103985	0	0	0
AC015660.1		0	0.152401	0	2.84415
AC015660.2		0	0	0	2.84415
AC015660.3		0.415941	0	0	0
AC015688.1		0	0	0	11.3766
AC015689.1		0	0	0.46601	19.909
AC015712.2		0.831882	3.20043	2.79606	0
AC015712.4		0.103985	0	0	0
AC015712.6		2.59963	0	0	0
AC015722.2		0.727896	0	0	5.6883
AC015726.1		0	4.87684	0	0
AC015726.3		4.15941	1.21921	13.9803	0
AC015743.1		3.22354	4.57204	0	0
AC015799.1		7.69491	17.2213	30.2907	42.6622
AC015802.6	Uncharacterized protein;unassigned	0	0	0.233005	0
AC015804.1		0.519926	0	0	0
AC015813.1		44.6097	47.854	151.453	76.792
AC015813.3		0	0	0.233005	0
AC015813.5		1.03985	0	0	0
AC015813.6		26.3083	23.3174	0	73.9479
AC015818.2		0	3.04802	0	0
AC015819.1		0	6.85806	16.7764	0
AC015849.2		0.311956	0	0	0
AC015849.3		3.43151	5.02924	19.3394	11.3766
AC015849.4		0	0	0	2.84415
AC015849.5		3.11956	0	0	19.909
AC015849.7		0.103985	1.67641	0.46601	0
AC015853.1		1.76775	4.72444	0	0
AC015853.2		0	0.304802	0.699016	0
AC015871.1		0.20797	0	0	0
AC015871.3		3.5355	7.77246	0	0
AC015871.4		5.40723	0	0	0
AC015871.6		3.74347	0	0	0
AC015883.1		11.6463	6.70565	0	0
AC015884.3		1.03985	0	0	0
AC015909.5		1.45579	0	15.6114	0
AC015910.1		3.5355	0	11.4173	0
AC015911.3		9.04671	0	0	0
AC015911.4		0.103985	0	0	0
AC015911.7		0	0	0	14.2207
AC015920.1		1.24782	0	0.233005	0
AC015921.1		0	5.02924	0	0
AC015922.2		2.70362	0	0	0
AC015922.3		1.45579	0	0	0
AC015923.1		1.45579	0	12.5823	0
AC015961.1		12.2703	5.33404	0	0
AC015961.2		3.43151	0	0	0
AC015971.1		7.59092	6.55325	0	0
AC015983.2		0	1.98122	0	0
AC015987.1		0	0	6.99016	0
AC016026.1		3.22354	4.87684	0	0
AC016026.2		4.15941	11.5825	8.38819	0
AC016027.1		2.70362	5.02924	0	0
AC016027.2		9.56664	7.62006	0	0
AC016027.3		5.92716	8.22967	0	0
AC016027.5		2.91159	0	0	0
AC016042.1		5.40723	0	64.0764	0
AC016065.1		3.5355	1.98122	0	0
AC016074.1		0	0	0	5.6883
AC016074.2		6.23911	9.90608	0	0
AC016144.1		8.63077	8.22967	0	0
AC016152.1		0	0	0	36.9739
AC016168.1		4.36738	0	0	11.3766
AC016168.2		1.87173	1.67641	0	0
AC016168.4		10.0866	1.98122	27.9606	0
AC016168.5		0	0	8.8542	11.3766
AC016240.1		1.55978	0	0	0
AC016245.1		1.55978	4.87684	0	0
AC016245.2		5.19926	9.75368	0	0
AC016292.2		0.727896	0	0	0
AC016383.2		0	0	0	5.6883
AC016394.2		5.09528	2.43842	0	0
AC016394.3		5.51122	7.77246	12.5823	0
AC016394.4		7.59092	0	20.9705	0
AC016397.2		1.45579	1.82881	0	0
AC016405.1		0.20797	0	0	0
AC016493.1		4.36738	8.53447	0	0
AC016526.3		1.66376	0	0	0
AC016542.1		2.18369	0	0	0
AC016542.3		0.831882	0	0	0
AC016549.1		0.103985	6.55325	19.1064	0
AC016553.1		0	0	0	25.5973
AC016559.3		0.20797	0	0	0
AC016571.1		0	3.04802	0	0
AC016582.2		0	0.457204	0.932021	0
AC016582.3		12.5822	15.3925	34.2518	93.8569
AC016586.1		0	15.3925	15.8444	25.5973
AC016590.1		1.24782	6.70565	0.233005	5.6883
AC016590.2		3.43151	11.4301	0	0
AC016590.3		0.623911	0	0	0
AC016590.4		8.73476	1.82881	0	14.2207
AC016596.1		0	1.67641	0	0
AC016597.2		9.98258	15.6973	0	39.8181
AC016598.1		0	0	0.233005	0
AC016601.1		0	0	6.52415	0
AC016642.1		1.76775	18.8978	0	14.2207
AC016687.2		0.103985	0	0	0
AC016696.2		0.935867	0	0	0
AC016705.2		8.94273	6.70565	0	48.3505
AC016705.3		1.76775	11.4301	30.2907	0
AC016716.1		4.05542	0	0.233005	0
AC016716.2		2.70362	25.2986	44.97	0
AC016717.1		8.83874	0	0	0
AC016717.2		121.559	83.9731	30.7567	0
AC016717.3		0	5.18164	0	39.8181
AC016721.1		1.55978	0	0	0
AC016722.2		2.49565	0	0	0
AC016727.1		2.0797	0	0	0
AC016727.3		0.727896	7.16286	12.1163	0
AC016734.1		1.03985	0.152401	0	0
AC016734.2		0	0	20.9705	0
AC016737.1		1.55978	3.81003	0	0
AC016746.1		0	0	0	14.2207
AC016747.1		2.39166	1.82881	0	11.3766
AC016747.2		2.28767	7.77246	0	0
AC016747.3		2.49565	0	0	0
AC016769.1		0.103985	0	15.3783	0
AC016769.3		0.519926	0	0	0
AC016769.5		0.415941	0	0	0
AC016772.1		0	0	18.4074	0
AC016813.2		0.20797	0	0	5.6883
AC016816.1		2.18369	3.96243	0	0
AC016821.1		2.18369	0.152401	0	0
AC016831.1		82.3563	83.6683	20.2715	99.5452
AC016831.3		2.18369	5.18164	0	0
AC016831.4		24.6445	55.4741	19.3394	105.234
AC016831.5		2.59963	0	0	0
AC016831.6		78.7168	60.5033	16.0774	11.3766
AC016866.1		1.55978	6.55325	0	0
AC016866.2		2.28767	0	0	0
AC016868.1		0	0	0	8.53245
AC016876.2		4.26339	0	0	2.84415
AC016876.3		2.28767	0	0	0
AC016885.2		2.59963	0	0	0
AC016907.2		1.66376	0	0	0
AC016924.1		2.18369	0	0	56.883
AC016931.1		1.55978	0	0	0
AC016949.1		3.11956	0	0	36.9739
AC016954.1		0	2.28602	0	0
AC016987.1		0	0	8.8542	0
AC016995.1		0.415941	0.152401	0.46601	0
AC016999.2		1.97572	3.20043	0	0
AC017000.1		0.831882	0	0	0
AC017002.1		0.831882	0	0	0
AC017007.2		0.935867	0	0	0
AC017007.3		4.15941	13.4113	0	0
AC017007.5		1.35181	0	0	0
AC017028.1		0	4.41964	0	2.84415
AC017028.2		4.05542	14.3257	20.7375	0
AC017035.1		0	0	0	2.84415
AC017037.4		0	0	0	17.0649
AC017050.1		0	10.9729	0	0
AC017099.1		2.39166	9.29648	0	0
AC017100.1		1.66376	0	0	0
AC017101.1		0	8.83927	0	0
AC017104.1		0	5.94365	19.5724	5.6883
AC017104.4		0	8.53447	0	31.2856
AC017116.2		4.15941	0.152401	0.233005	0
AC018371.1		0	0	12.5823	22.7532
AC018371.2		0	0.152401	0	0
AC018398.1		7.69491	4.87684	0	0
AC018410.1		2.28767	0	0	0
AC018437.3		0.727896	2.74322	0	0
AC018445.4		1.14384	0	0	0
AC018445.5		0.519926	0	0	0
AC018450.1		0	1.82881	0	0
AC018462.1		2.59963	0	7.22316	0
AC018463.1		0	6.55325	0	0
AC018470.1		1.87173	0	10.2522	0
AC018521.7		0.103985	0	0	0
AC018529.2		0.311956	4.26723	0	2.84415
AC018529.3		2.18369	0	0	0
AC018552.3		0	4.11483	0	0
AC018557.2		3.11956	0.152401	0	0
AC018558.7		1.24782	0	0	0
AC018620.1		1.76775	0	8.38819	0
AC018628.2		0.103985	10.9729	68.9696	0
AC018628.3		5.40723	5.02924	0	0
AC018637.1		1.35181	7.46766	0	0
AC018638.2		3.11956	0	0	14.2207
AC018638.3		1.35181	0	0	0
AC018638.4		2.0797	10.0585	30.7567	19.909
AC018638.5		5.92716	13.1065	10.7182	0
AC018638.6		3.74347	17.3737	0	0
AC018638.7		4.78332	14.6305	9.55321	0
AC018641.1		1.35181	0	0	0
AC018645.3		0.415941	0	0.46601	0
AC018647.1		1.35181	0	0	0
AC018647.2		15.2858	0	0	0
AC018647.3		5.51122	9.75368	5.59213	0
AC018648.1		0.831882	0	0	0
AC018653.3		2.18369	0	15.1453	0
AC018653.4		1.76775	0	0	0
AC018665.1		5.82317	2.89562	0	45.5064
AC018678.1		0	0	0	2.84415
AC018682.1		7.59092	0	0	39.8181
AC018685.1		3.22354	0	0	0
AC018685.2		2.59963	0	0	0
AC018685.3		2.91159	13.2589	0	51.1947
AC018688.1		0	0	0	19.909
AC018688.2		0.623911	0	0	0
AC018690.1		0	1.67641	0	0
AC018693.1		1.35181	0	0	0
AC018695.4		1.97572	3.65763	0	22.7532
AC018695.7		3.43151	0	0	0
AC018697.1		3.32753	0	2.09705	45.5064
AC018712.1		1.66376	0	0	0
AC018730.1		3.01557	1.37161	35.1838	0
AC018731.1		0	0	0	28.4415
AC018742.1		3.95144	0	0	0
AC018752.1		2.0797	0	0	0
AC018754.1		2.59963	0	0	0
AC018755.3		1.03985	0	8.8542	0
AC018766.1		2.49565	0	0	28.4415
AC018797.2		1.76775	0	0	25.5973
AC018797.3		6.75904	5.48644	7.68917	14.2207
AC018809.1		0	2.89562	0	0
AC018809.2		5.19926	12.6493	0	2.84415
AC018816.1		0	3.81003	0	0
AC018816.2		0.727896	0	0	0
AC018832.1		2.49565	0	0	0
AC018845.3		0	5.18164	0	0
AC018861.1		5.51122	12.1921	0	0
AC018861.2		1.14384	0	0	0
AC018892.3		1.76775	0	0	0
AC018904.1		1.66376	6.55325	0	22.7532
AC018926.1		0	3.96243	0	0
AC018931.1		4.99129	2.59082	0	0
AC018946.1		2.70362	0	0	0
AC018978.1		8.63077	23.165	0	0
AC018992.1		1.35181	1.82881	0	22.7532
AC019068.1		2.39166	8.99167	18.1744	0
AC019070.1		1.24782	0	0	0
AC019070.2		1.55978	0	23.0675	0
AC019072.1		0	0	15.3783	0
AC019077.1		0	1.37161	0	0
AC019080.1		9.1507	5.94365	0	56.883
AC019080.4		0	0	16.3104	0
AC019080.5		2.8076	7.77246	0	0
AC019097.1		1.55978	11.8873	0.233005	0
AC019109.1		2.18369	0	0	17.0649
AC019117.2		0.935867	0	0	0
AC019118.1		2.18369	6.40085	10.2522	0
AC019118.2		8.63077	16.9165	0	0
AC019127.1		1.14384	0	0	0
AC019131.2		1.03985	0	0	0
AC019155.2		0	1.52401	0	0
AC019159.2		3.95144	0	0	0
AC019178.1		0.103985	0	0	0
AC019185.1		0	9.60128	0	0
AC019186.1		0.311956	0	0	0
AC019197.1		1.14384	0	0	14.2207
AC019205.1		23.1887	36.8811	39.6109	11.3766
AC019211.1		1.97572	0	0	0
AC019226.1		2.70362	0	10.4852	0
AC019227.1		1.66376	6.70565	0	0
AC019254.1		0	1.82881	0	0
AC019254.2		0	5.48644	0	48.3505
AC019257.1		4.15941	0.152401	0	0
AC019257.2		0.415941	0	14.9123	0
AC019278.1		1.55978	0	0	0
AC019294.2		1.35181	0	0	0
AC019294.3		0	0	0	17.0649
AC020549.2		0	0	6.75715	0
AC020550.1		1.55978	0	0	0
AC020558.2		0.623911	0	0	0
AC020558.5		0.727896	0	0	0
AC020558.6		1.76775	0	5.59213	0
AC020594.1		1.03985	0	0	0
AC020612.1		0.20797	0	0	0
AC020612.3		2.8076	0	0	28.4415
AC020612.4		0.311956	0	37.2808	0
AC020651.2		0	0	0	8.53245
AC020655.1		1.55978	0	0	0
AC020656.2		0	3.50523	0	0
AC020658.3		1.55978	5.63885	0	0
AC020658.5		1.55978	0	0	0
AC020658.6		0.415941	0	0	31.2856
AC020658.7		0.415941	4.41964	28.4266	5.6883
AC020659.1		0	4.11483	0.233005	0
AC020661.1		0	0	11.6503	22.7532
AC020661.2		2.39166	5.94365	0	0
AC020661.3		0	3.96243	0	0
AC020661.4		0	3.65763	0	0
AC020663.3		2.28767	0	0	0
AC020663.4		0.415941	6.24845	0	0
AC020663.5		0	5.18164	0	0
[truncated: 27,155 more rows]
